# Supplementary material for: Fine bubble technology for the green synthesis of fairy chemicals
Source: Royal Society of Chemistry journal article supplement (doi:10.1039/d4ob00237g), 2024-01-01
Supplement: d4ob00237g1.pdf [file d4ob00237g1.pdf]

## Supporting information

### Fine bubble technology for the green synthesis of fairy chemicals

Arun Kumar Manna,<sup>a</sup> Mizuki Doi,<sup>b</sup> Keiya Matsuo,<sup>b</sup> Hiroto Sakurai,<sup>b</sup> Ch. Subrahmanyam,<sup>c</sup> Kohei Sato,<sup>a,b,d</sup>  
Tetsuo Narumi,<sup>a,b,d</sup> Nobuyuki Mase<sup>a,b,d</sup>

<sup>a</sup>Department of Optoelectronics and Nanostructure Science, Graduate School of Science and Technology,  
Shizuoka University, 3-5-1 Johoku, Hamamatsu 432-8561, Shizuoka, Japan

<sup>b</sup>Department of Engineering, Graduate School of Integrated Science and Technology, Shizuoka University,  
3-5-1 Johoku, Hamamatsu 432-8561, Shizuoka, Japan

<sup>c</sup>Department of Chemistry Indian Institute of Technology, Hyderabad, 502285, Sangareddy, Telengana,  
India

<sup>d</sup>Research Institute of Green Science and Technology, Shizuoka University, 3-5-1 Johoku, Hamamatsu 432-  
8561, Shizuoka, Japan

## Contents

|                                                                                           |    |
|-------------------------------------------------------------------------------------------|----|
| Synthetic scheme from ester (18).....                                                     | 3  |
| Synthetic scheme by using NH <sub>3</sub> in the final stage .....                        | 4  |
| Synthetic scheme using methyl 2-cyano acetate.....                                        | 4  |
| Synthesis scheme by using 2-cyano acetamide as a starting material.....                   | 5  |
| Cascade-type one-pot reduction coupling using microporous-FB generator.....               | 5  |
| Cascade-type one-pot reduction coupling using pressurized-depressurized FB generator..... | 7  |
| Cascade-type one-pot reduction coupling using spray-type FB generator .....               | 10 |
| Cascade-type one-pot reduction coupling using MSE FB generator .....                      | 12 |
| Oxime conversion and AICA formation optimization using MSE FB generator .....             | 14 |
| Catalyst amount optimization .....                                                        | 14 |
| Catalyst optimization .....                                                               | 15 |
| Reaction solvent optimization.....                                                        | 15 |
| Concentration optimization.....                                                           | 16 |
| Formamidine acetate equivalent optimization .....                                         | 16 |
| Different types of formamidine salt.....                                                  | 17 |
| Mechanism of FB formation .....                                                           | 18 |
| FB Concentration measurement.....                                                         | 18 |
| Relation between MB and AICA yield .....                                                  | 19 |
| Calibration curve for AICA with internal standard (Benzimidazole).....                    | 20 |
| HPLC chromatogram for OPRCR .....                                                         | 20 |
| DICA stability determination.....                                                         | 21 |
| Mass spectra of intramolecular cyclisation reaction .....                                 | 22 |
| References.....                                                                           | 23 |
| Compound Data .....                                                                       | 24 |

### Synthetic scheme from ester (18)

At first, we focused on synthesizing the active intermediate AICA from an ester. We have chosen ethyl cyano(hydroxyimino)acetate (**18**) as a starting material and the reduction reaction was done first to synthesize ethyl 2-amino-2-cyanoacetate (**19**) by using a spray-type FB generator. Then, the amidation reaction was done using ammonia gas to get 2-amino-2-cyanoacetamide (**13**) and finally the coupling reaction to get AICA (**4**).

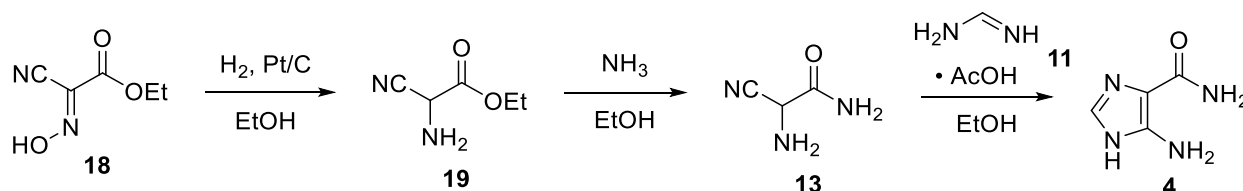

**Scheme S1.** Starting material- ethyl 2-cyano-2-(hydroxyimino)acetate (**18**), reduction to ethyl 2-amino-2-cyanoacetate (**19**) amidation to 2-amino-2-cyanoacetamide (**13**), reductive coupling to AICA (**4**)

Both the reduction and amidation reaction was done by using spray type FB generator with a 78% yield. However low yield was found during the coupling reaction. We found that the previously used ammonia was affecting the coupling reaction, we added excess acetic acid from outside to activate the reaction, but the reactivity did not enhance. The reaction without ammonia and acetic acid is the preferred condition for the coupling reaction. However, it is not easy to remove ammonia from amino nitrile (**13**) for a plant batch, and it is not a suitable synthesis pathway from the green chemistry viewpoint. Then focused on using ammonia in the final stage by changing the reaction pathway.

**Table S1.** Effect of acid additive for the synthesis of AICA from ethyl ester

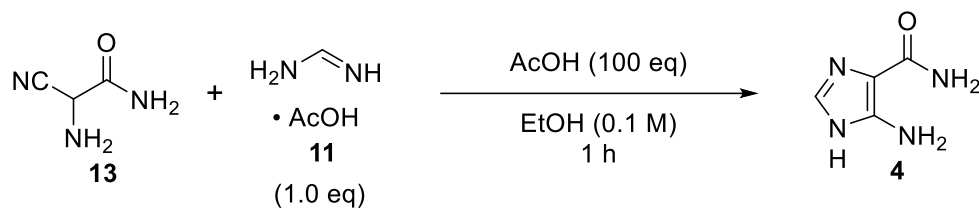

| Entry | Solvent              | Additives | Temperature (°C) | Yield (%) <sup>a</sup> |
|-------|----------------------|-----------|------------------|------------------------|
| 1     | EtOH <sup>b</sup>    | -         | 80               | 50                     |
| 2     | EtOH                 | AcOH      | 80               | n.d. <sup>c</sup>      |
| 3     | EtOH                 | -         | 120              | 28                     |
| 4     | EtOH                 | AcOH      | 120              | n.d.                   |
| 5     | EtOH-NH <sub>3</sub> | -         | 80               | 20                     |
| 6     | EtOH-NH <sub>3</sub> | AcOH      | 80               | n.d.                   |
| 7     | EtOH-NH <sub>3</sub> | -         | 120              | 32                     |
| 8     | EtOH-NH <sub>3</sub> | AcOH      | 120              | n.d.                   |

<sup>a</sup>Determined by <sup>1</sup>H NMR with dimethyl sulfone as an internal standard. <sup>b</sup>NH<sub>3</sub> was removed by concentration.

<sup>c</sup>AICA was not detected.

### Synthetic scheme by using NH<sub>3</sub> in the final stage

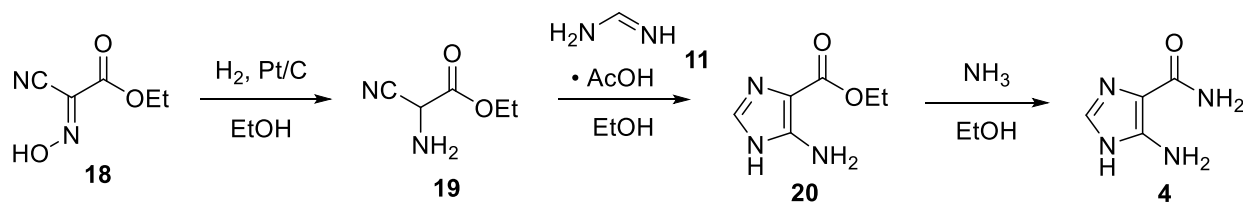

**Scheme S2.** Starting material ethyl 2-cyano-2-(hydroxyimino)acetate (**18**), reduction to ethyl 2-amino-2-cyanoacetate (**19**), coupling reaction to ethyl 5-amino-1H-imidazole-4-carboxylate (**20**), finally amidation reaction to AICA (**4**)

After reducing oxime (**18**), a coupling reaction of ethyl 2-amino-2-cyanoacetate (**19**) and formamidine in batch condition was performed, yielding the ester (**20**) in 42% yield. Then, the amidation by ammonia which is the final stage was examined. First, the examination of ammonia FB by the spray-type FB generator was tried, but the amidation did not progress at one pass (30 °C, 11 mL/min). In addition, the circulatory system was tested. Still, as it circulated, the solvent absorbed ammonia, and it became difficult to pump the liquid according to the flow rate set by the pump (it is considered that it becomes negative pressure when sucking up the solution, and ammonia in the system becomes gas). Therefore, the amidation of ester **20** was performed at 0.3 MPa and 120 °C conditions in a pressure-resistant container. However, the progress of the reaction was not observed even after 2 hours.

### Synthetic scheme using methyl 2-cyano acetate

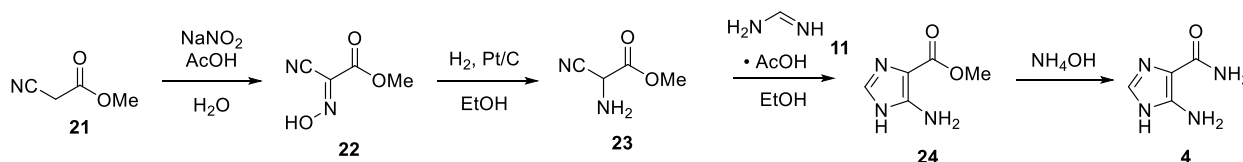

**Scheme S3.** Starting material methyl 2-cyano acetate (**21**), oximation to methyl 2-cyano-2-(hydroxyimino)acetate (**22**), reduction to methyl 2-amino-2-cyanoacetate (**23**), coupling reaction to methyl 5-amino-1H-imidazole-4-carboxylate (**24**) amidation in aqueous ammonia to AICA (**4**).

Next, we started with methyl ester (**21**) as the reactivity of methyl ester towards ammonolysis is higher than the ethyl ester.<sup>1</sup> Methyl 2-cyano-2-(hydroxyimino)acetate (**22**) was prepared using our usual method, yielding compound **24** in 52% yield (**21** to **24**). Amidation reaction was attempted using the pressure-resistant container described above for ethyl ester **20**, but the progress of the reaction was not confirmed. Therefore, decided to investigate the uniform liquid-phase reaction using aqueous ammonia, not just the gas-liquid phase reaction. After mixing the ester with aqueous ammonia, the vial was sealed at 100 °C. However, since the progress of the response could hardly be confirmed even after 3 hours had elapsed, it was judged to be difficult to put this scheme into practice.

### Synthesis scheme by using 2-cyano acetamide as a starting material

The effect of the reaction using ammonia on the next stage, or the low activity of ammonia has been cited as a problem so far. Therefore, using 2-cyanoacetamide as the starting material, we designed a scheme for AICA synthesis that avoids ammonia.

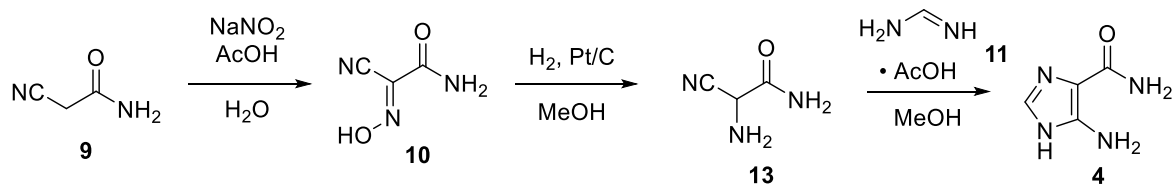

**Scheme S4.** Starting material 2-cyano acetamide (**9**), oximation to 2-amino-N-hydroxy-2-oxoacetimidoyl cyanide (**10**), reduction to 2-amino-2-cyanoacetamide (**13**), coupling reaction to AICA (**4**)

After the synthesis of oxime **10**, the reduction of oxime by using spray type FB generator, the reduction yield was 91%. But there was a possibility of over reduction of **13**, and the stability of **13** was in concern. Again, the coupling reaction yield was 67%. So, we have planned to do a cascade-type one-pot reduction coupling reaction.

### Cascade-type one-pot reduction coupling using microporous-FB generator

Micro porous FB generator is supplied by NORITAKE CO., LIMITED, Japan. This system injects pressurized gases through a tubular ceramic membrane with nanopores to create FBs. The reaction setup for a microporous FB method is composed of an HPLC pump, a hydrogen flow controller, a back pressure regulator, an MSE FB generator, a packed bed reactor for catalyst, a column oven (SHIMADZU), an SUS coil reactor, and a thermocouple.

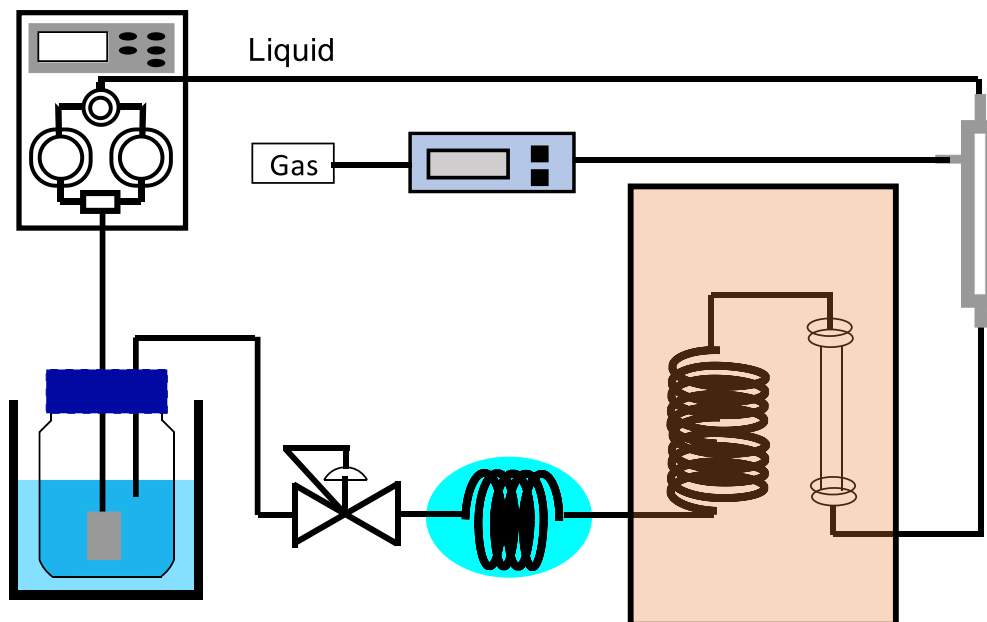

**Figure S1.** Schematic diagram for the microporous FB reaction

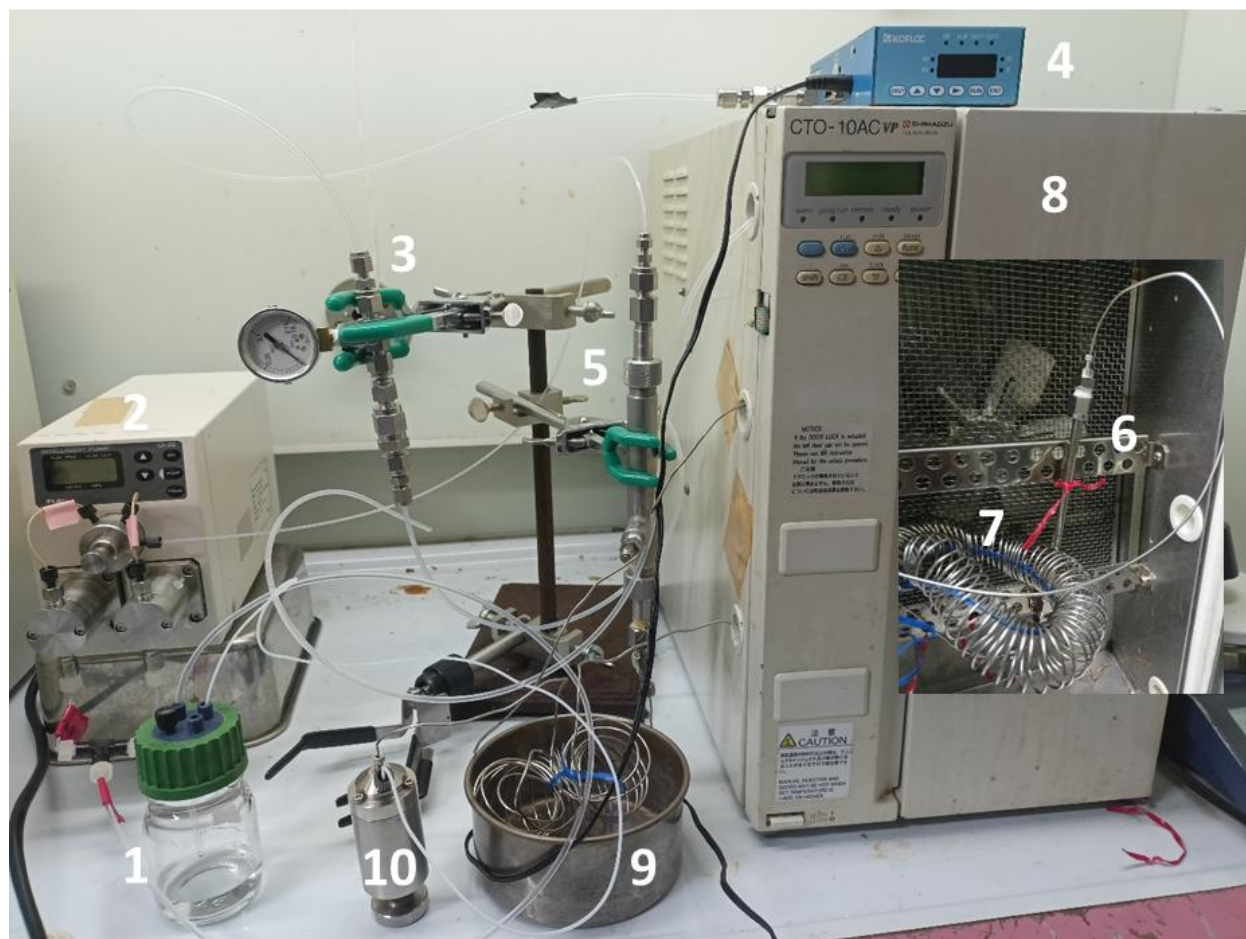

**Figure S2.** Picture of the reaction set up for microporous FB generator

Set-up explanation: using a glass beaker (1) to make the reaction solution, pump (2) is used to circulate the reaction solution from the glass beaker, microporous FB generator has (5), two connectors, the liquid flow from the up connector and gas flow from side connector. The hydrogen gas passes through a pressure gauge (3) and Mass flow controller (4) to find out the gas pressure and gas flow rate, respectively. Inside the generator, gases are passed through the microporous element and form FB by mixing with liquid. a column oven (8) to heat the reaction solution, a packed bed reactor placed inside the oven filled with catalyst (6) and up flow for the reduction of oxime, and a SUS coil reactor (7) inside the oven for the coupling reaction, another submerged coil reactor (9) to reduce the temperature by cooling, a back pressure regulator (10) to control the flow rate and a thermocouple to check to the temperature of reaction mass.

### **Temperature dependence on the synthesis of AICA and by-product:**

The formation of AICA at different temperatures has been observed by using a microporous type of FB generator. Checked the AICA formation and by-product/AICA area ratio at 60 °C, 80 °C and 120 °C, respectively. other variables like formamidine acetate (1.2 equivalent), methanol (0.1 M), catalyst (3 mol%), and hydrogen gas flow keep constant. The obtained result indicates that the formation of AICA increases with increasing temperature. The ratio of by-product/AICA also increases with increasing temperature; it indicates that by-product formation also increases with increasing temperature.

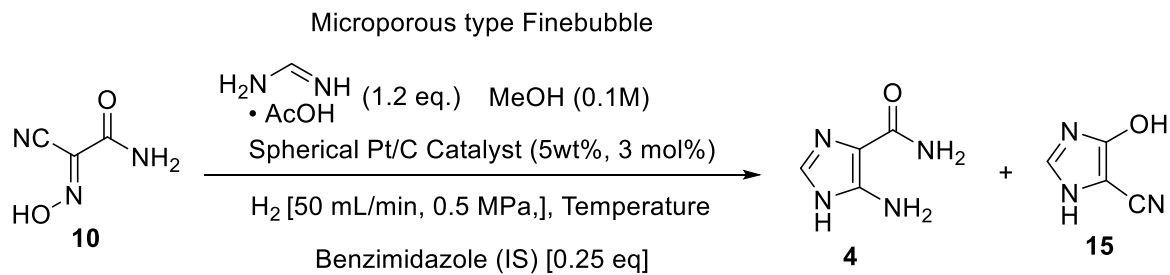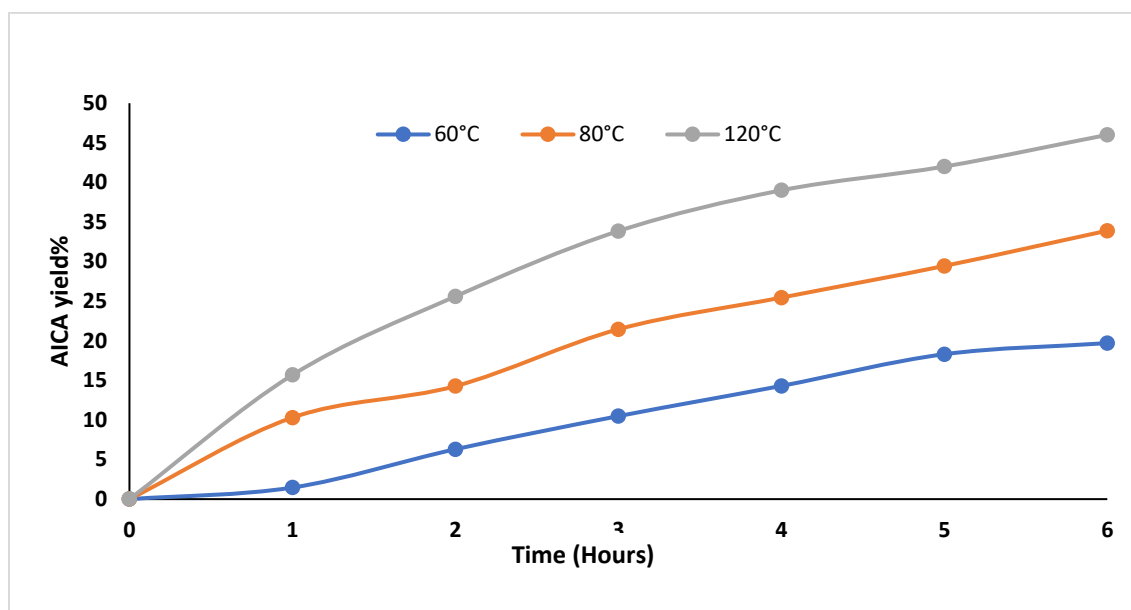

Figure S3. AICA formation at different temperatures

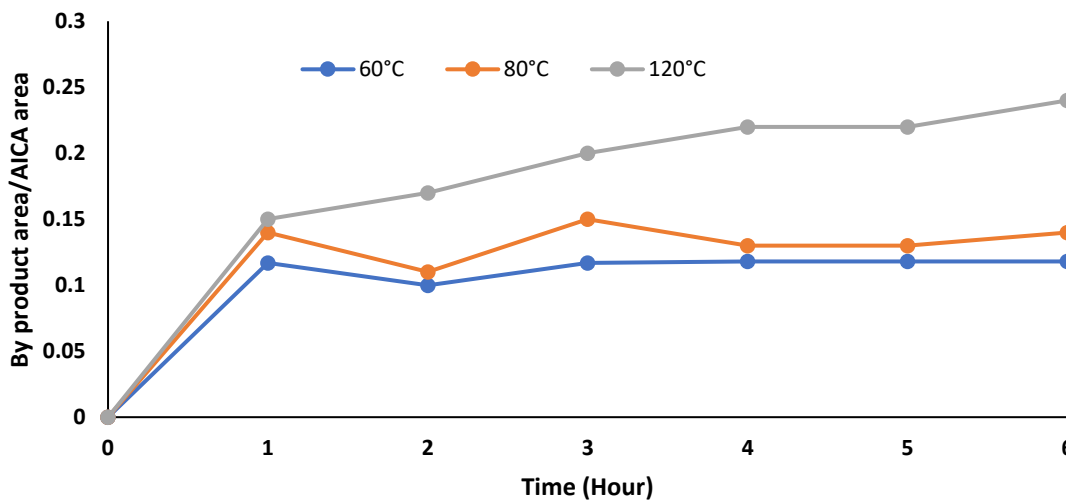

Figure S4. By-product/AICA area ratio at three different temperatures

Cascade-type one-pot reduction coupling using pressurized-depressurized FB generator.

Pressurized-depressurized FB generator was supplied by PMT Inc., Japan, composed of an HPLC pump, a hydrogen flow controller, two back pressure regulators, a mixer, a Packed bed reactor for catalyst, a column oven (SHIMADZU), and a thermocouple.

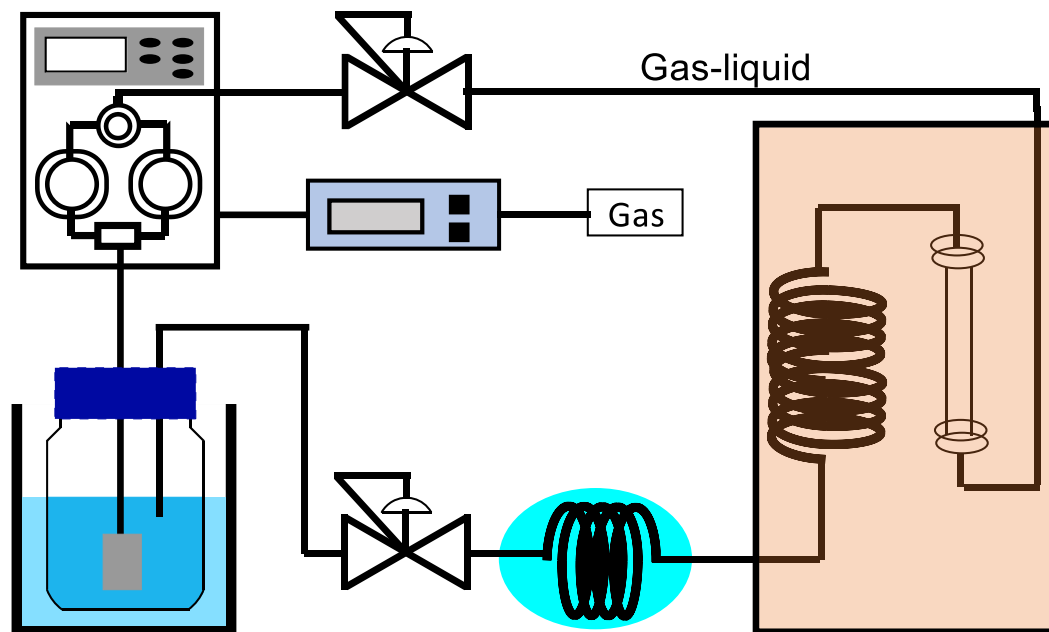

Figure S5. Schematic diagram for the pressurized-depressurized FB generator



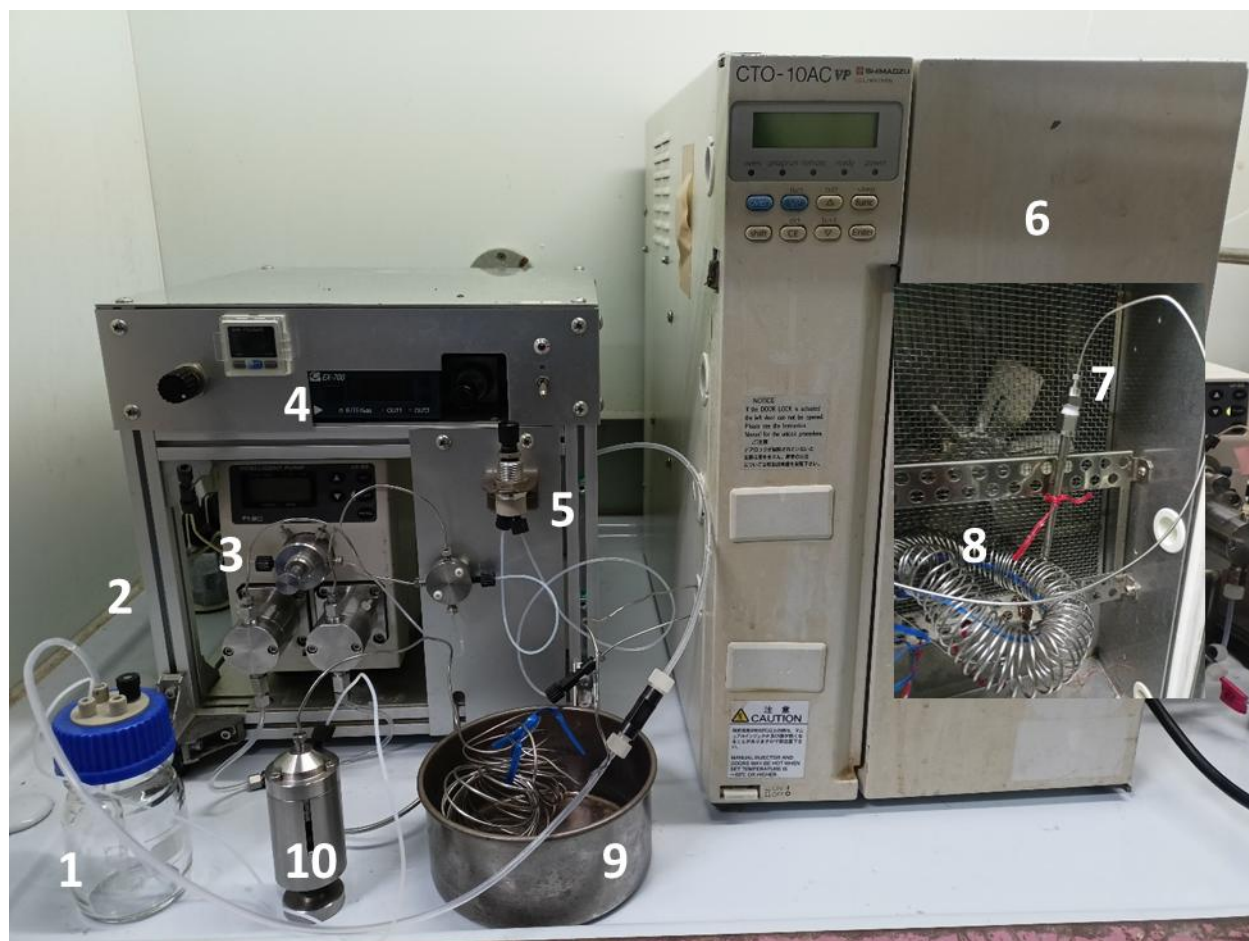

**Figure S6.** Picture of the reactor set up for pressurized-depressurized FB generator.

Reaction Set-up explanation: using a glass beaker (1) to make the reaction solution, a pressurized depressurized FB generator (2), which is made by combining a pump (3) is used to circulate the reaction solution from the glass beaker, a continuous hydrogen gas flow from a gas cylinder via mass flow controller (4), gas and liquid mix by the back pressure regulator (5) and used to make FB of the gas-liquid mixture, a column oven (6) to heat the reaction solution, a packed bed catalyst column (7) and a SUS coil reactor (8) inside the oven for the coupling reaction, another submerged coil reactor (9) to reduce the temperature after reaction, second back pressure regulator (10) to control the flow rate and a thermocouple to check to the temperature of reaction mass.

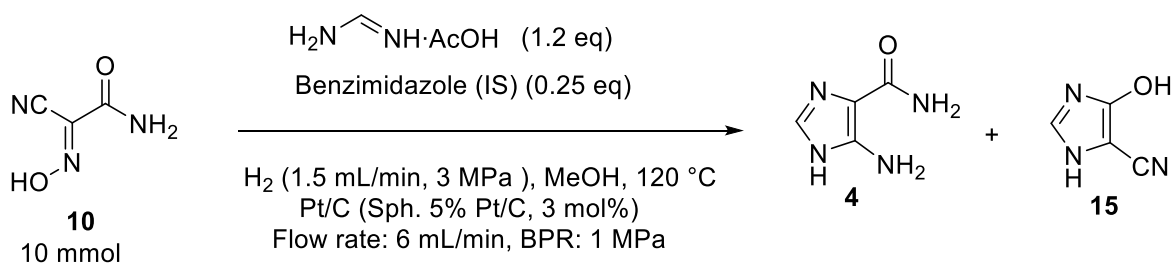

**Scheme S5.** Cascade-type one-pot reduction coupling using pressurized-depressurized FB generator.

Dissolved the oxime, formamidine acetate, and benzimidazole in methanol and placed the spherical Pt/C (5wt%) inside the column.). Placed a coil reactor (6.25 mL) with a catalyst column inside the oven (120 °C). Placed a water cooling before the second BPR to decrease the solution temperature. For this generator, the limitation is the flow rate. For this reaction, the liquid flow rate is 4.5 mL/min, and the hydrogen gas flow rate is 1.5 mL/min, applying the pressure of 3 MPa. The reaction was continued for 6 hours, but due to the limited gas supply and limited FB formation the AICA formation is not so high, it is around 34%.

### Cascade-type one-pot reduction coupling using spray-type FB generator

Our laboratory developed its spray-type FB generator. Since FB is generated only by attaching a spray nozzle to the reaction tube supplying gas, this device can reduce the cost and experimental space by introducing the conventional FB generator. The reaction set up for the spray FB generator is composed of an HPLC pump, a spray nozzle, a SUS coil reactor, a hydrogen flow controller, a back pressure regulator, a steel reactor, a cylindrical filter, a column oven (SHIMADZU)

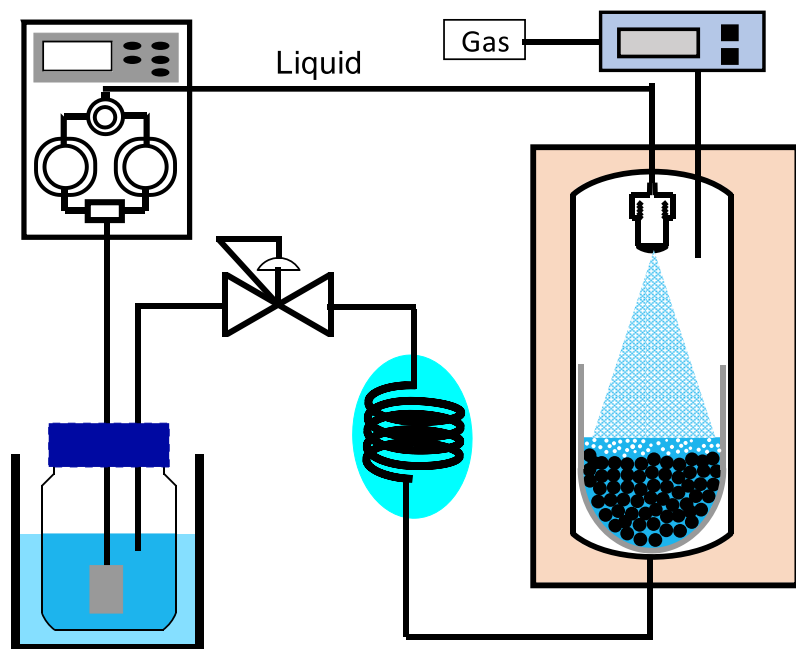

**Figure S7.** The schematic diagram for the spray FB generator

Set-up explanation: using a glass beaker (1) to make the reaction solution, pump (2) is used to circulate the reaction solution from the glass beaker, a continuous hydrogen gas flow from a gas cylinder and measure the gas flow rate by mass flow controller (3) and gas pressure by pressure gauge (4). a column oven (5) to heat the reaction solution, a steel reactor to create the FB (6) which has two connector, liquid flow as spray from upside and gas flow from side connector, FBs formed at the interface between the liquid and liquid spray at the presence of gas, a spray nozzle to convert the liquid into spray, a cylindrical filter to keep the catalyst inside the steel reactor, SUS coil for the coupling reaction (7) a submerged coil reactor (8) to reduce the temperature, a back pressure regulator (9) to control the flow rate and a thermocouple to check to the temperature of reaction mass.

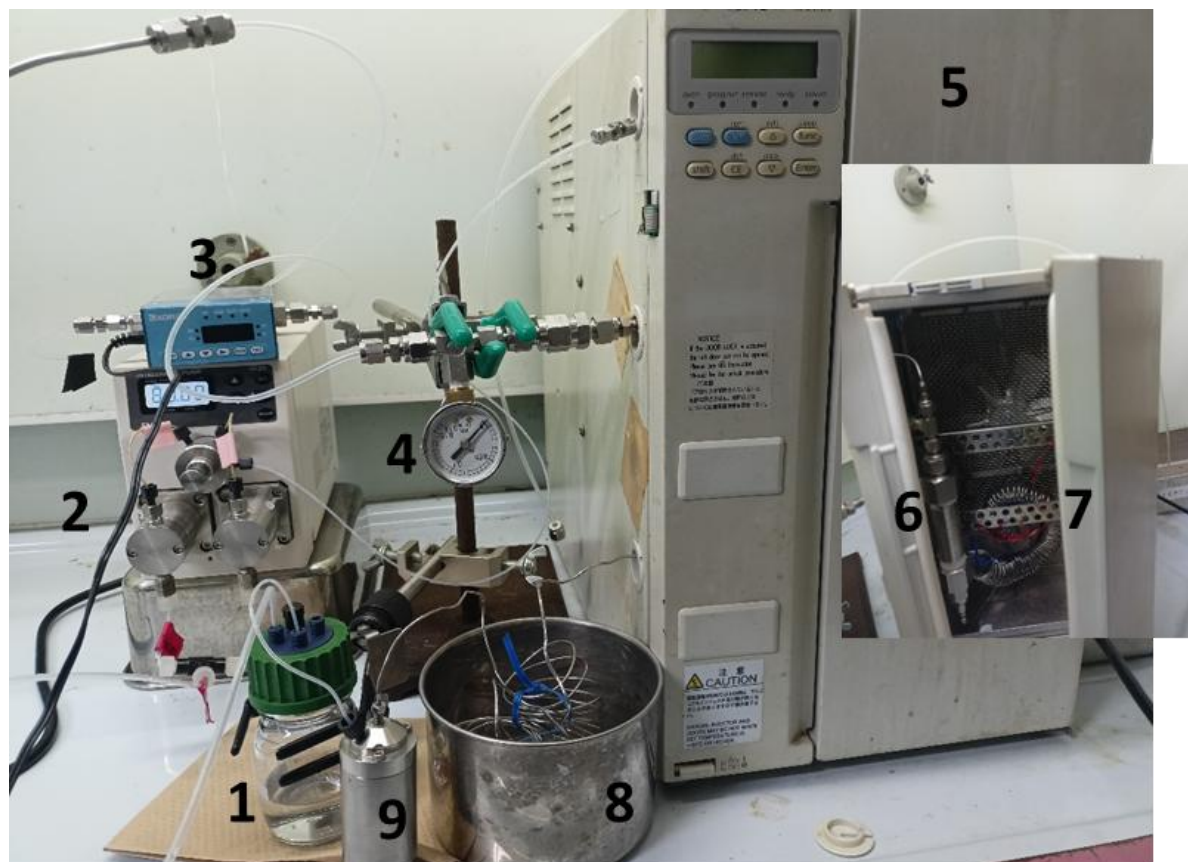

**Figure S8.** Picture of the reactor set up for spray FB generator

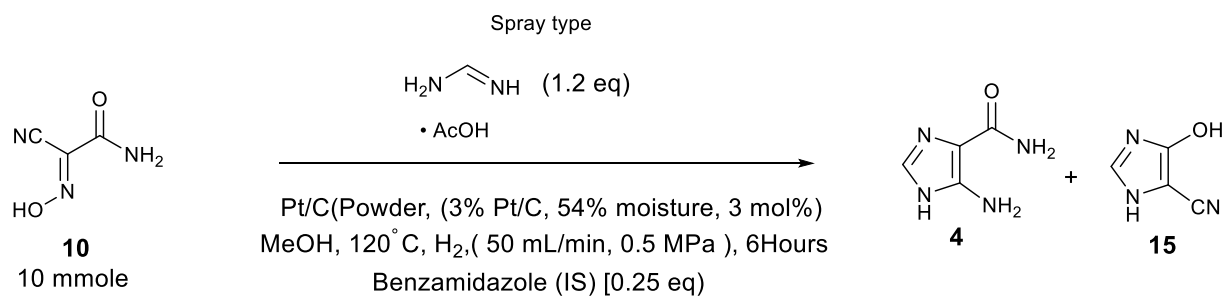

**Scheme S6.** Cascade-type one-pot reduction coupling using spray-type FB generator.

For this case, we have used a steel reactor and placed the powder Pt/C catalyst inside the reactor in a cylindrical filter paper. The pump flow rate was 10 mL/min, and the gas flow rate was 50-60 mL/min, under a constant pressure of 0.5 MPa. Placed a water bath for cooling after the oven. The reaction was continued for 6 hours at 120 °C. The AICA formation after 6 hours is also very low, around 7%.

### Cascade-type one-pot reduction coupling using MSE FB generator

MSE FB generator is composed of a two-layer glass reactor, multi-stacked stirrer, mass flow controller, heating ribbons, condenser, and Thermocouple.

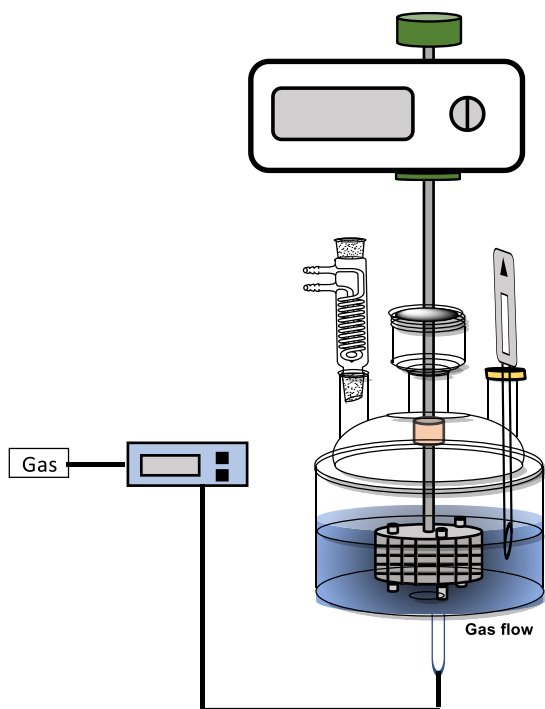

**Figure S9.** Schematic diagram for the MSE FB generator

In this case, the constant gas is supplied through a mass flow controller (1) to the reactor which is made of two separate glass reactors (4 and 5) via the connector (6). A multi-stack element stirrer (8) is connected to the upper glass and stirred by a stirrer (2). A reflux condenser (3) was used to cool down the vapour. The solution was heated by heating ribbons (7)

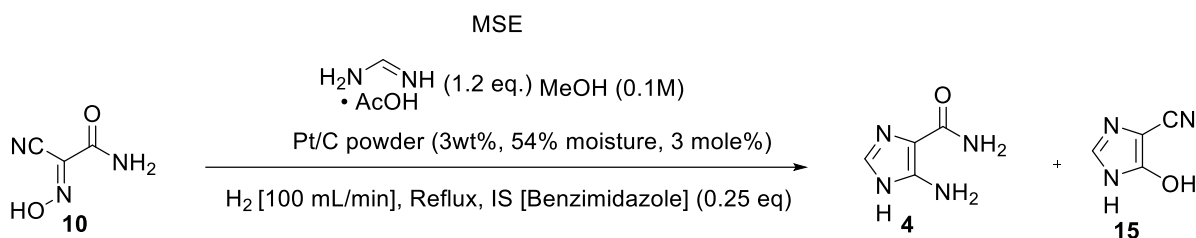

**Scheme S7.** Cascade-type one-pot reduction coupling using MSE FB generator.

At first, the gas flow was started (100 mL/min). A 100 mL solution of oxime (**10**, 10 mmol), and formamidine acetate (12 mmol) in methanol was added. the powder Pt/C catalyst (3 mol%) was added to the stirring reactor (carefully added, catalyst gets fire during addition due to the presence of hydrogen gas flow). Stirring speed 500 rpm. The reaction temperature increased by heating the ribbon and the reaction was continued under reflux conditions.

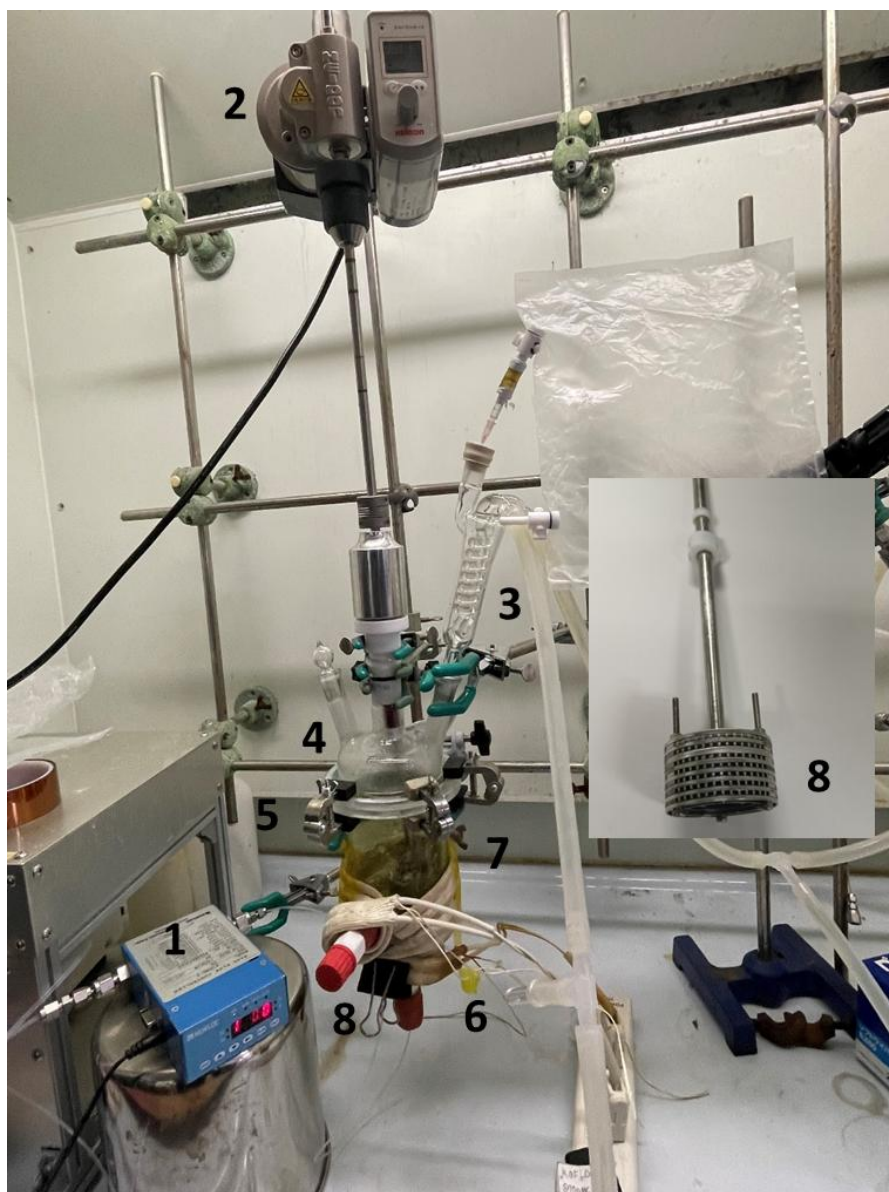

Figure S10. Picture of the reactor set up for MSE FB.



### Oxime conversion and AICA formation optimization using MSE FB generator

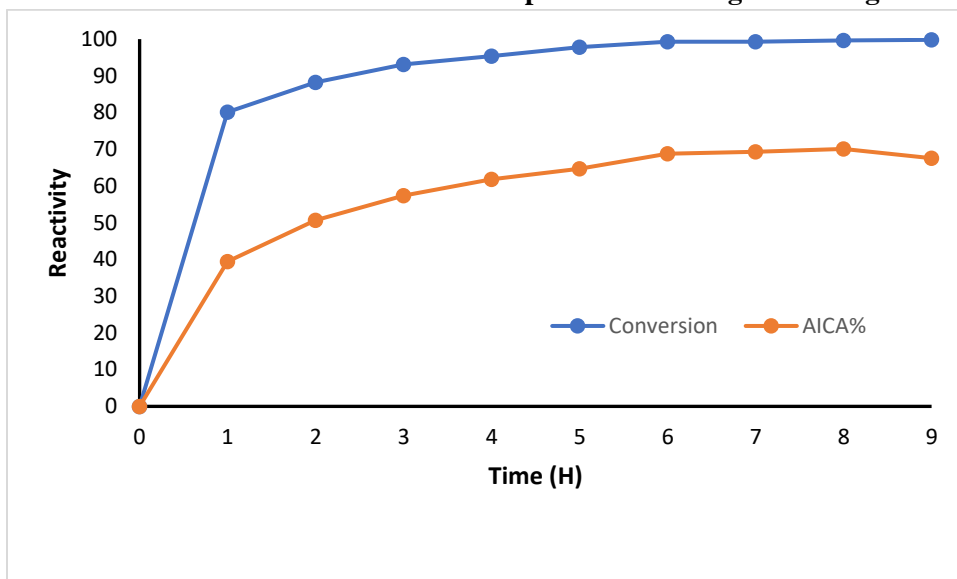

Figure S11. Reaction conversion and AICA yield% for MSE

### Catalyst amount optimization

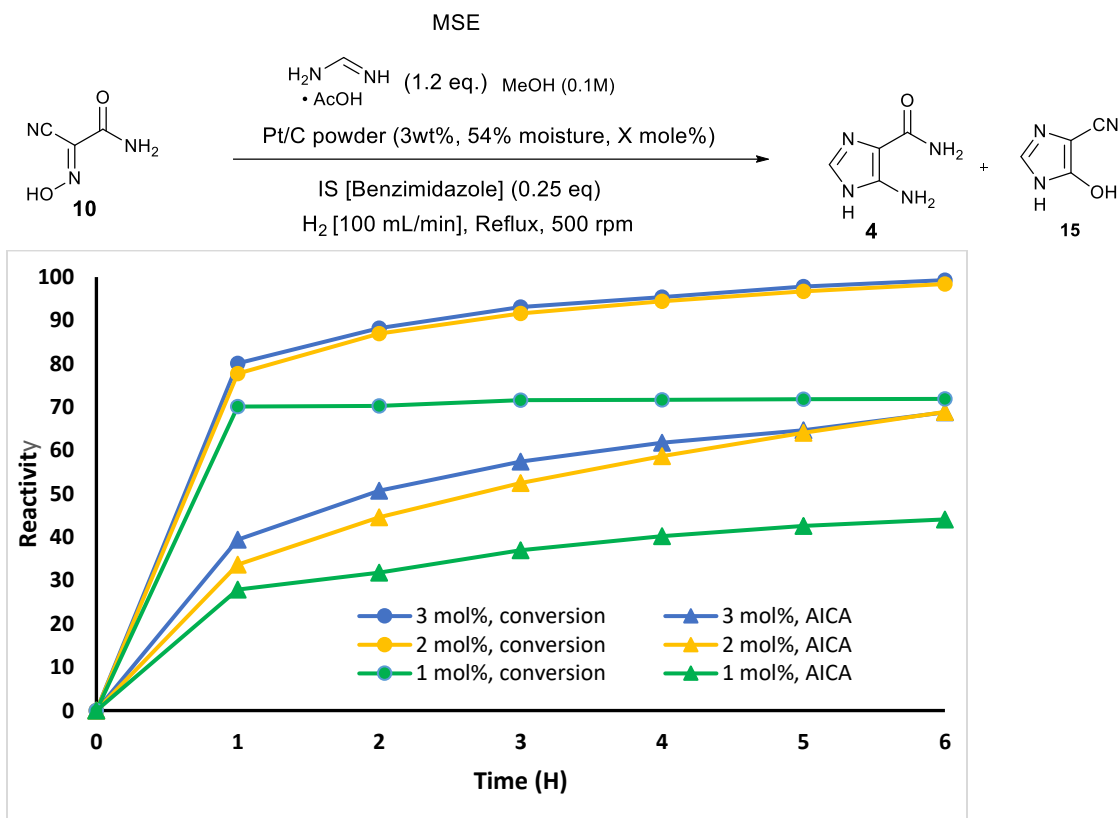

Figure S12. oxime conversion and AICA formation using different amount of Pt/C

## Catalyst optimization

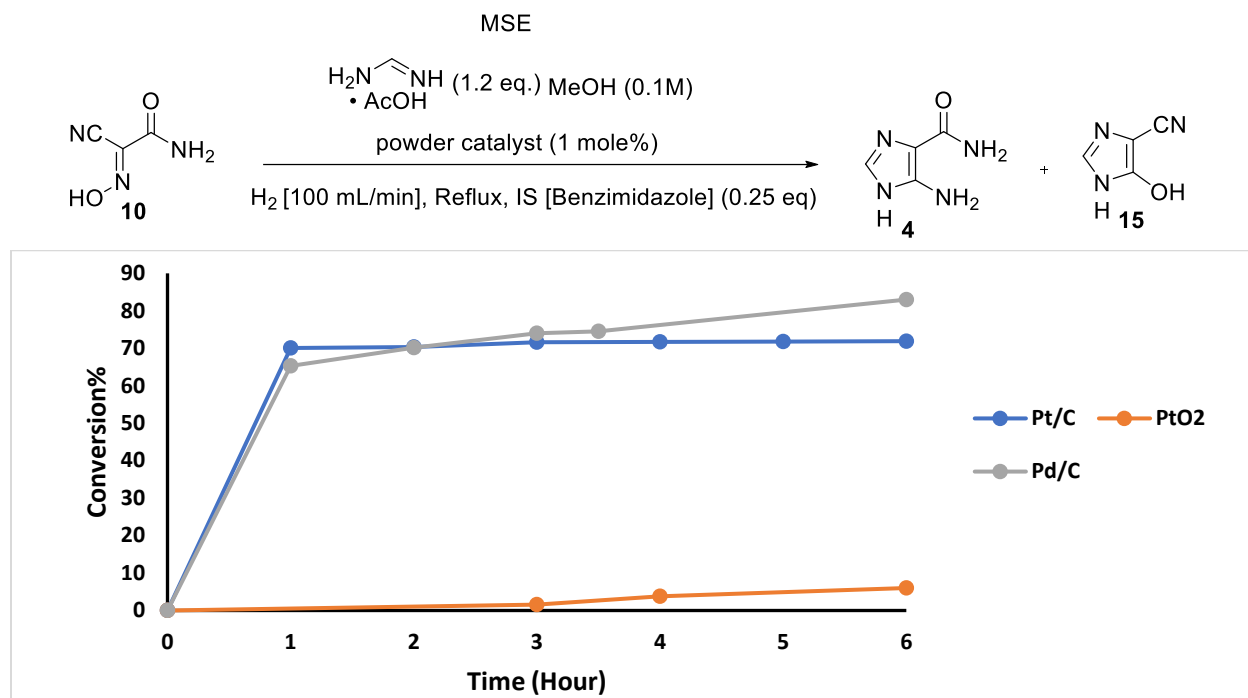

Figure S13. Oxime conversion of different catalyst

## Reaction solvent optimization

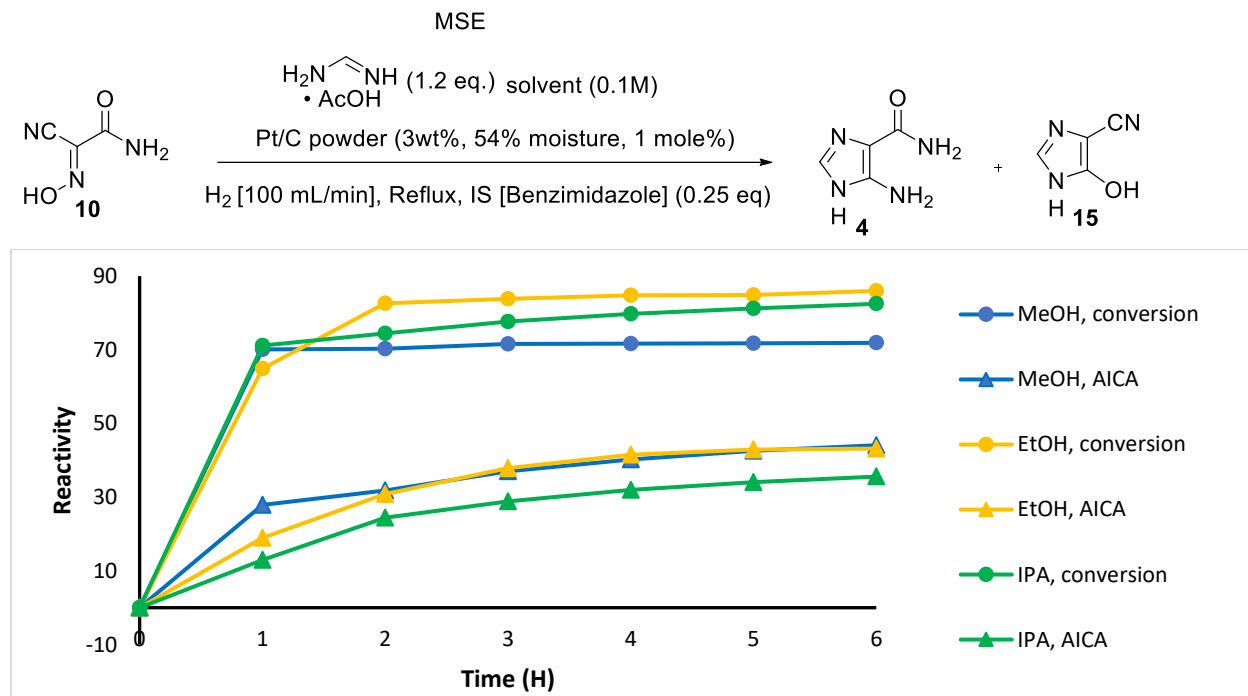

Figure S14. Oxime conversion and AICA formation using different solvent

## Concentration optimization

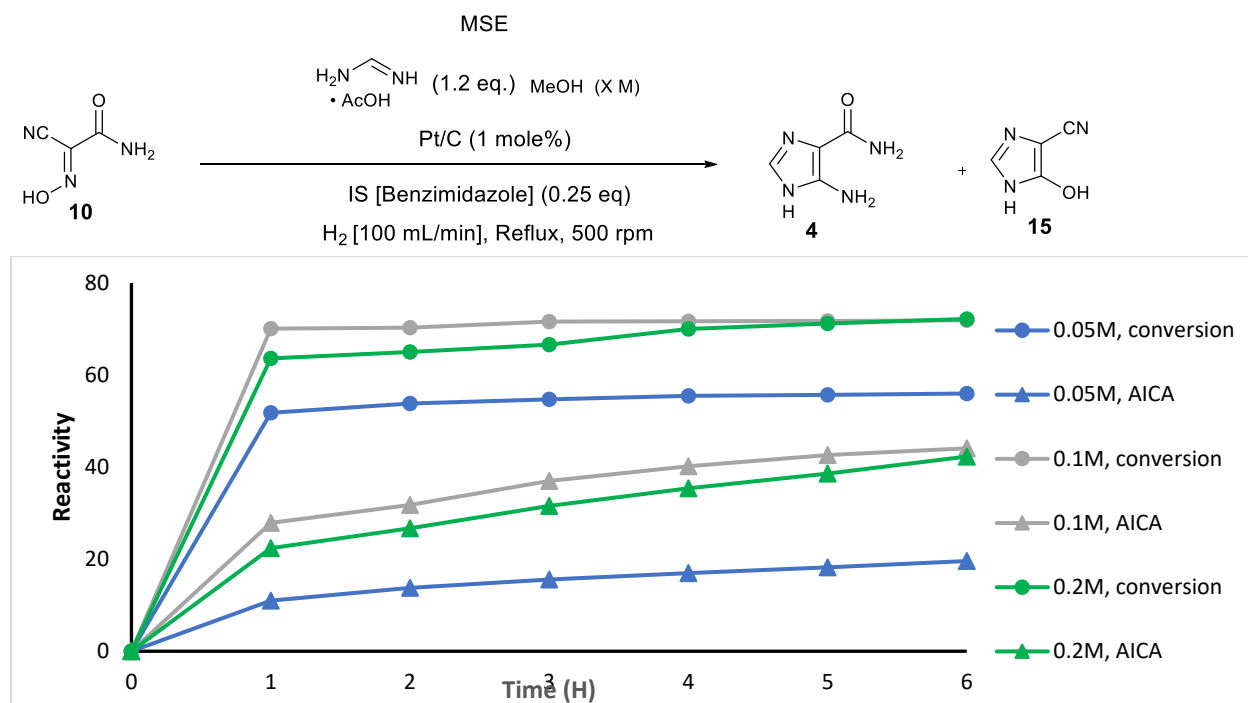

Figure S15. Oxime conversion and AICA formation using different concentration.

## Formamidine acetate equivalent optimization

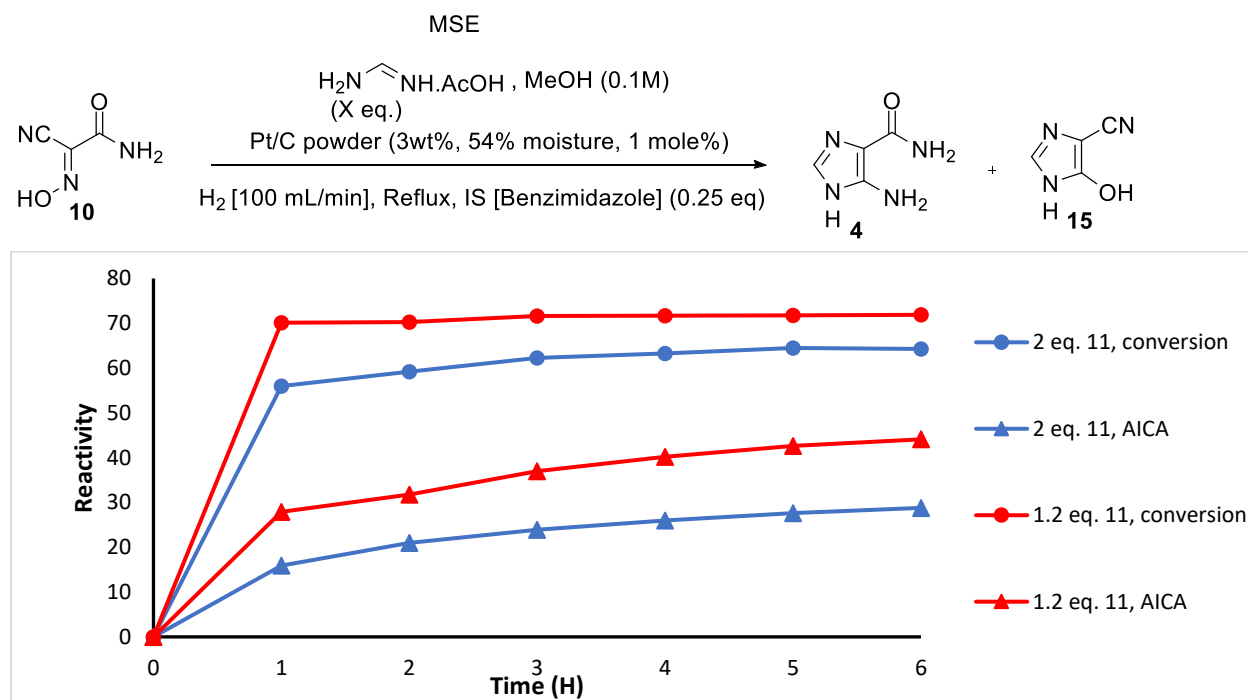

Figure S16. Oxime conversion and AICA formation using different amounts of formamidine acetate (11).



## Different types of formamidine salt

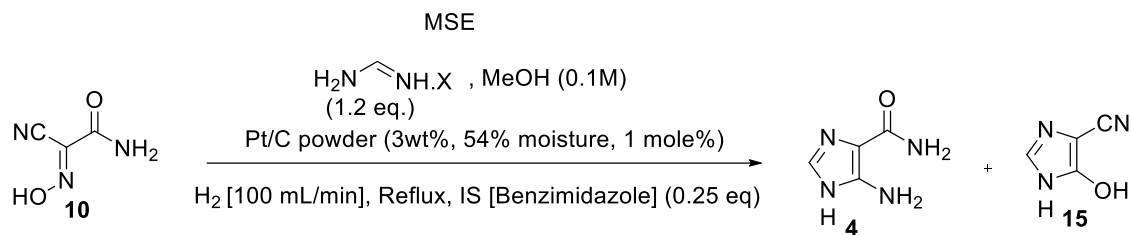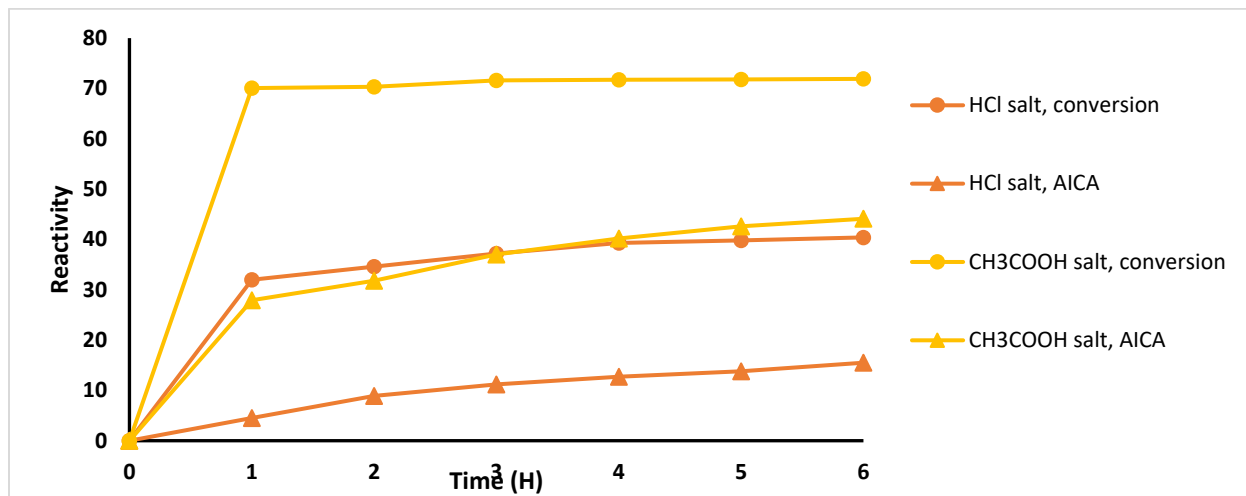

Figure S17. Oxime conversion and AICA formation using different formamidine salt.

### Mechanism of FB formation

Pressurized-depressurized FB generator generates FB by applying pressure and depressure respectively in a gas-liquid mixture (Figure A). The microporous FB method contains a microporous body that forms FB by passing the gas through the micropores in the presence of shear liquid force. For spray, first, when the droplet collides with the liquid surface at low speed, a hemispherical gas phase occurs between the droplet and the liquid surface. Next, a perforation is caused on the side of the air phase, and the end is combined as it spreads. Then, bubbles are generated in the form of necklaces. Eventually, they become FB by repeating spontaneous rupture (C, 1-4). For MSE up flow gas is supplied to form milli bubble by mixing with solvent. The FB is formed by high stirring of a multi stack element.

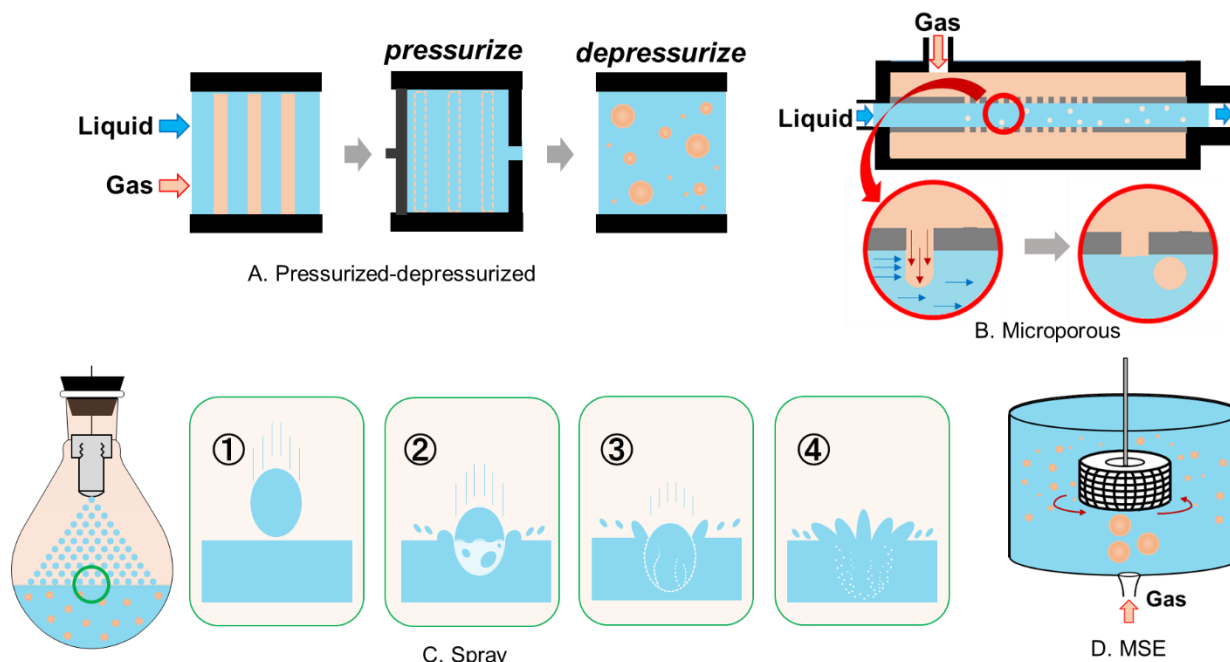

**Figure S18.** Mechanism for the formation of FB from different FB generator.

### FB Concentration measurement

NanoSight LM10 (Malvern Panalytical, UK) was used for UFB measurements, and PartAn SI (MicrotracBEL Corp., Japan) for MB measurements. The basic setup of the measurement equipment followed our previous experimental approach.<sup>2</sup> The operating times were assumed to be until the FB concentration reached a steady state.

| Generation method                      | Gas flow rate (mL/min) | Liquid flow rate (mL/min) | Total liquid volume (mL) | Operation time (h) |
|----------------------------------------|------------------------|---------------------------|--------------------------|--------------------|
| Microporous                            | 20                     | 80                        | 100                      | 4                  |
| Pressurized-depressurized <sup>a</sup> | 25                     | 25                        | 200                      | 4                  |
| MSE <sup>b</sup>                       | 50                     | —                         | 450                      | 2                  |
| Spray                                  | —                      | 50                        | 200                      | 6                  |

<sup>a</sup>BPR was for the maintenance of system pressure (4 MPa). <sup>b</sup>Stirring speed was 300 rpm.

### Relation between MB and AICA yield

To confirm the yield of AICA synthesised using different FB generators, we measured the concentration and size of the FBs. We used Nanosight (LM10, Malvern Panalytical, UK) and PartAn SI (MicrotracBEL Corp., Japan) to quantify the concentration and size of UFBs and MBs, respectively. The concentration of UFBs obtained using the spray-type FB generator was the highest ( $165 \times 10^7$  particle/mL), followed by that obtained using the microporous- ( $106 \times 10^7$  particle/mL), MSE- ( $79 \times 10^7$  particle/mL), and pressurized-depressurized ( $40 \times 10^7$  particle/mL) FB generators using Nanosight (Table 2). This finding indicates the reactivity order of the FB generators as spray > microporous > MSE > pressurised-depressurised. In our previous study, we confirmed that higher MB concentrations led to lower catalytic activity because larger MBs were adsorbed on the catalyst surface, reducing the available area for the reaction.<sup>2</sup> Therefore, we determined the MB concentration using PartAn SI, with the following results: spray (1635 particle/mL) > pressurised-depressurised (763 particle/mL) > microporous (103 particle/mL) > MSE (23 particle/mL). This finding indicates that the order of the FB generators for the catalytic activity is MSE > microporous > pressurised-depressurised > spray. Greater MB concentration reduces the catalytic activity.

**Table S2.** Concentration and size of UFBs and MBs measured using different FB generation methods

| FB generation method      | UFB concentration ( $\times 10^7$ particle/mL) <sup>a</sup> | UFB size (nm) <sup>a</sup> | MB concentration (particle/mL) <sup>b</sup> | MB size ( $\mu\text{m}$ ) <sup>b</sup> |
|---------------------------|-------------------------------------------------------------|----------------------------|---------------------------------------------|----------------------------------------|
| Spray                     | 165 $\pm$ 1.95                                              | 114 $\pm$ 1                | 1635 $\pm$ 15                               | 34.8 $\pm$ 0                           |
| Pressurised-depressurised | 39.7 $\pm$ 2.0                                              | 113 $\pm$ 1                | 763 $\pm$ 17                                | 66.7 $\pm$ 0.6                         |
| Microporous               | 106 $\pm$ 1.5                                               | 103 $\pm$ 2                | 429 $\pm$ 98                                | 36.9 $\pm$ 2.6                         |
| MSE                       | 79.3 $\pm$ 12.3                                             | 91 $\pm$ 3                 | 23 $\pm$ 0                                  | 10.6 $\pm$ 0                           |

<sup>a</sup>Determined by Nanosight. <sup>b</sup>Determined by PartAn SI

### Calibration curve for AICA with internal standard (Benzimidazole)

Hilic column (250 × 4.6 mm I.D. S-5 μm, 12 nm) has been used for the quantification of AICA. Acetonitrile and 50 mM NH<sub>4</sub>HCO<sub>2</sub> aqueous solution are used as an eluent with a gradient manner acetonitrile-50 mM NH<sub>4</sub>HCO<sub>2</sub> aq with a liner gradient of 95:5 to 40:60 over 15 minutes and then isocratic flow of 40:60 for 5 minutes at a flow rate of 1 mL/min at a detection wavelength of 265 nm. Benzimidazole was used as an internal standard.

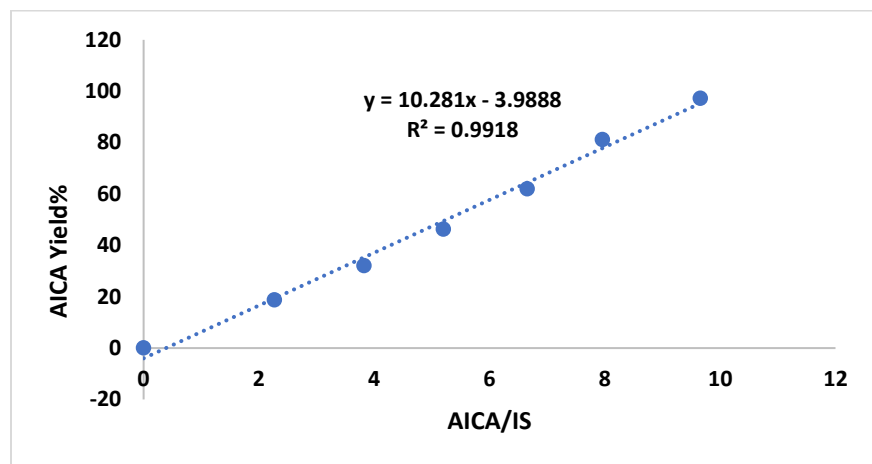

Figure S19. Calibration curve for AICA and internal standard (benzimidazole)

### HPLC chromatogram for OPRCR

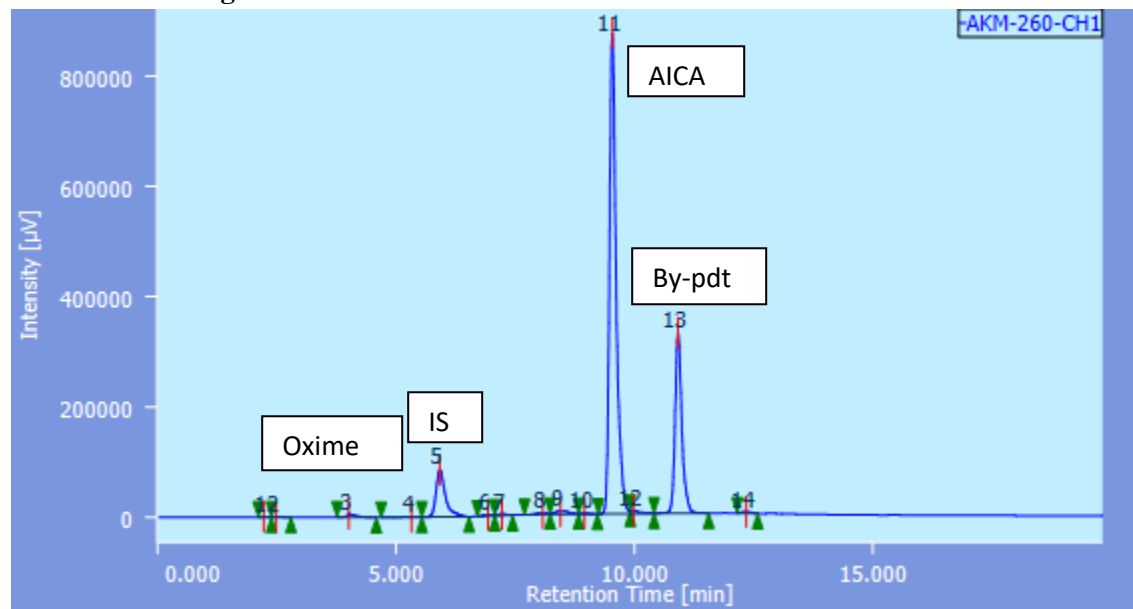

Figure S20. HPLC chromatogram of COPRC

## DICA stability determination

DICA stability was determined by  $^1\text{H}$  NMR, using a similar amount of DICA (0.017 mmol) and dimethyl sulfone (IS, 0.016 mmol). Here, the data for 0 days and after 22 days were shown. The ratio of the integrated area of DICA/dimethyl sulfone remained the same at 0.16 after 22 days. It indicates that DICA is stable at 4 °C for a long period.

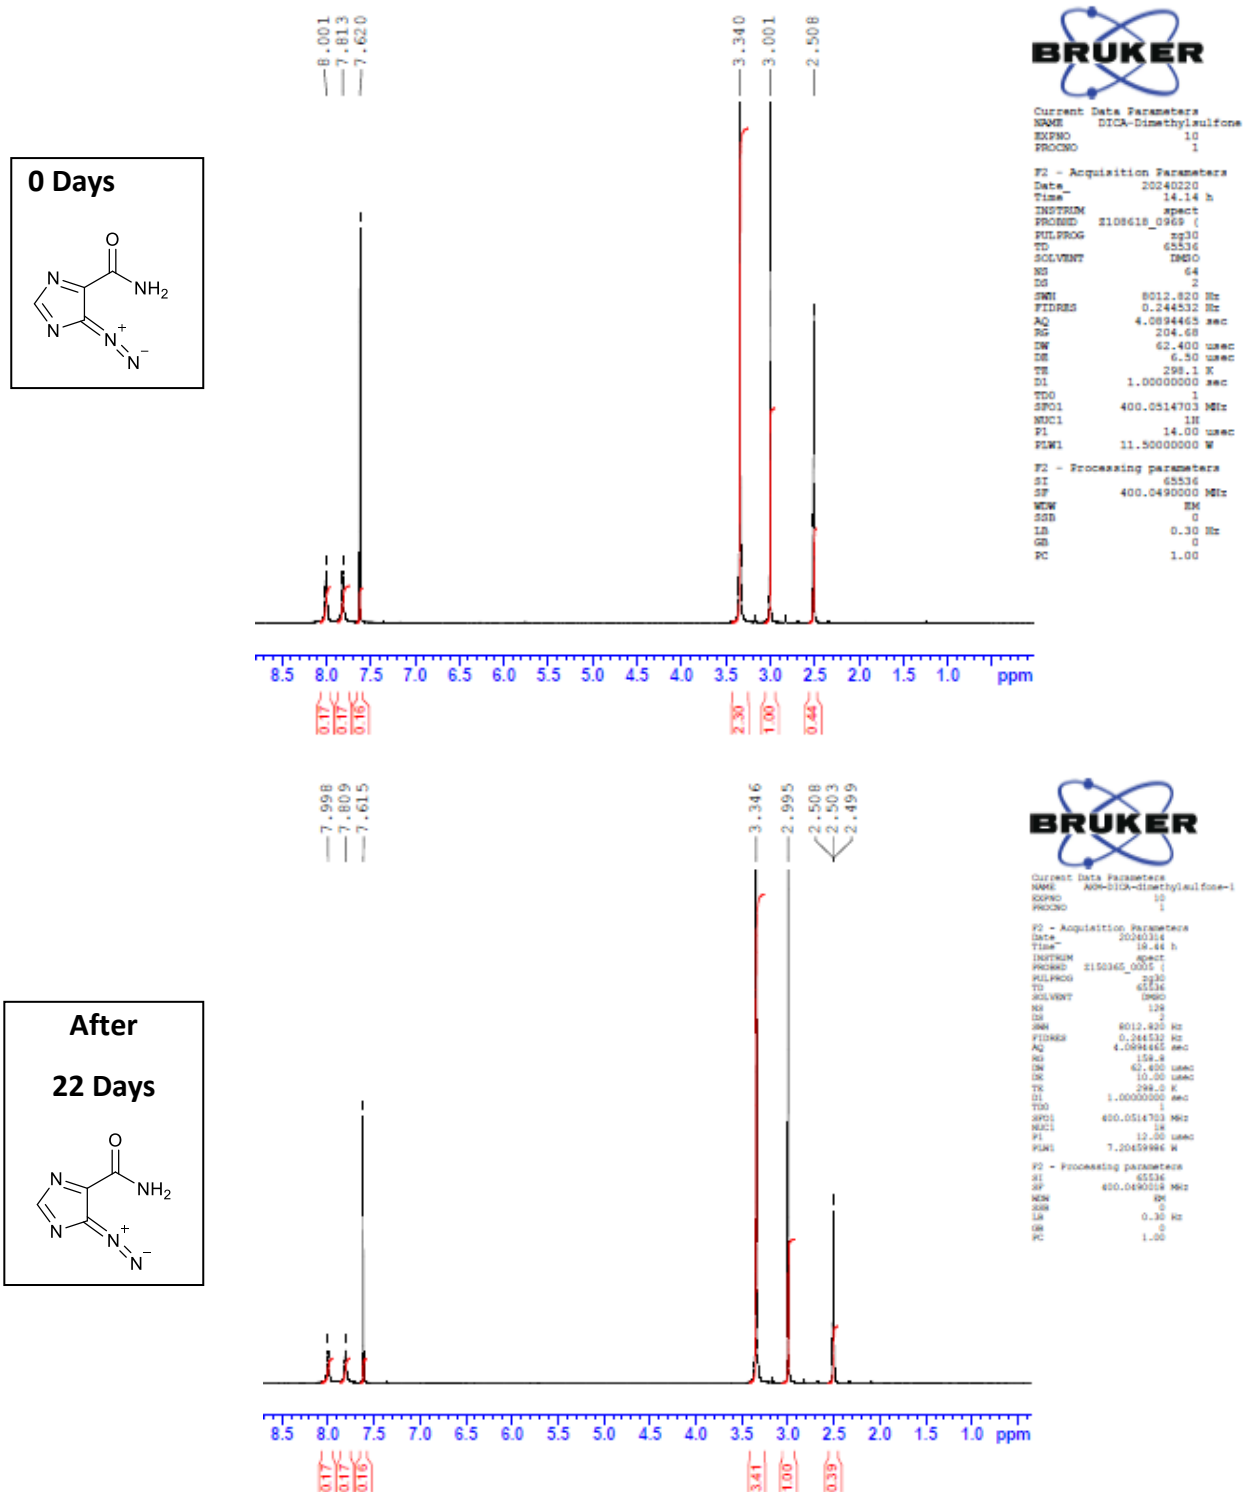

### Mass spectra of intramolecular cyclisation reaction

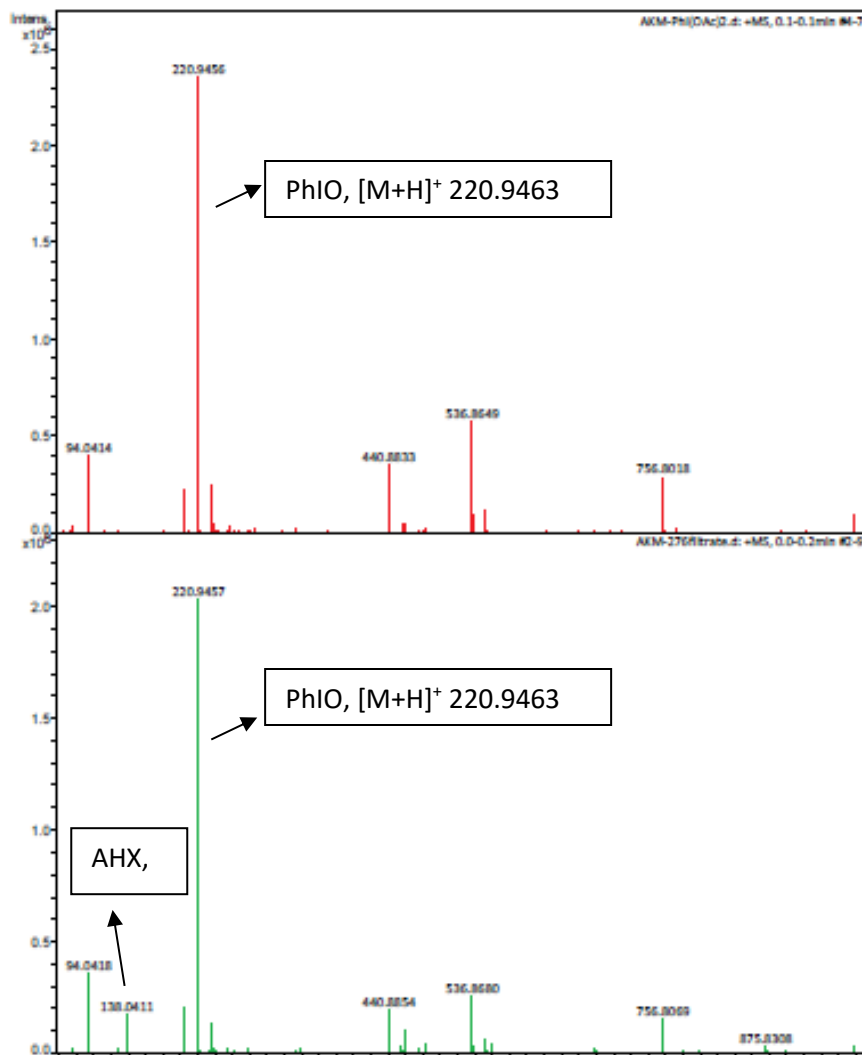

Figure S21. (a) Mass spectrum of PhI(OAc)<sub>2</sub> in water. (b) Mass spectrum of reaction mass

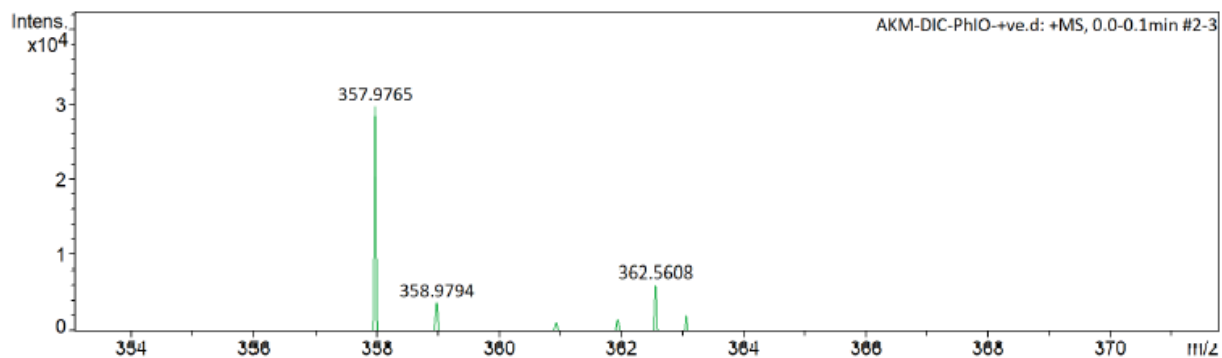

Figure S22. Mass spectra peaks for complex A/B.

## References

- 1 M. Gordon, J. G. Miller, A. R. Day. *J. Am. Chem. Soc.* 1948, **70**, 5, 1946–1953
2. T. Kozuka, T. Iio, S. Suzuki, K. Kakiuchi, G. Tadano, K. Sato, T. Narumi and N. Mase, *Bull. Chem. Soc. Jpn.*, 2023, **96**, 752–758

## Compound Data

### 2-Amino-N-hydroxy-2-oxoacetimidoyl cyanide (10)

Chemical Formula:  $C_3H_3N_3O_2$ ,

$^1H$  NMR (DMSO- $d_6$ , 400 MHz)  $\delta$  7.88 (s, 1H, -NH $_2$ ), 7.80 (s, 1H, -NH $_2$ ), 14.4 (-OH)

$^{13}C$  NMR (DMSO- $d_6$  100 MHz)  $\delta$  109.2 (CN), 128.3 (C), 160.0 (CO)

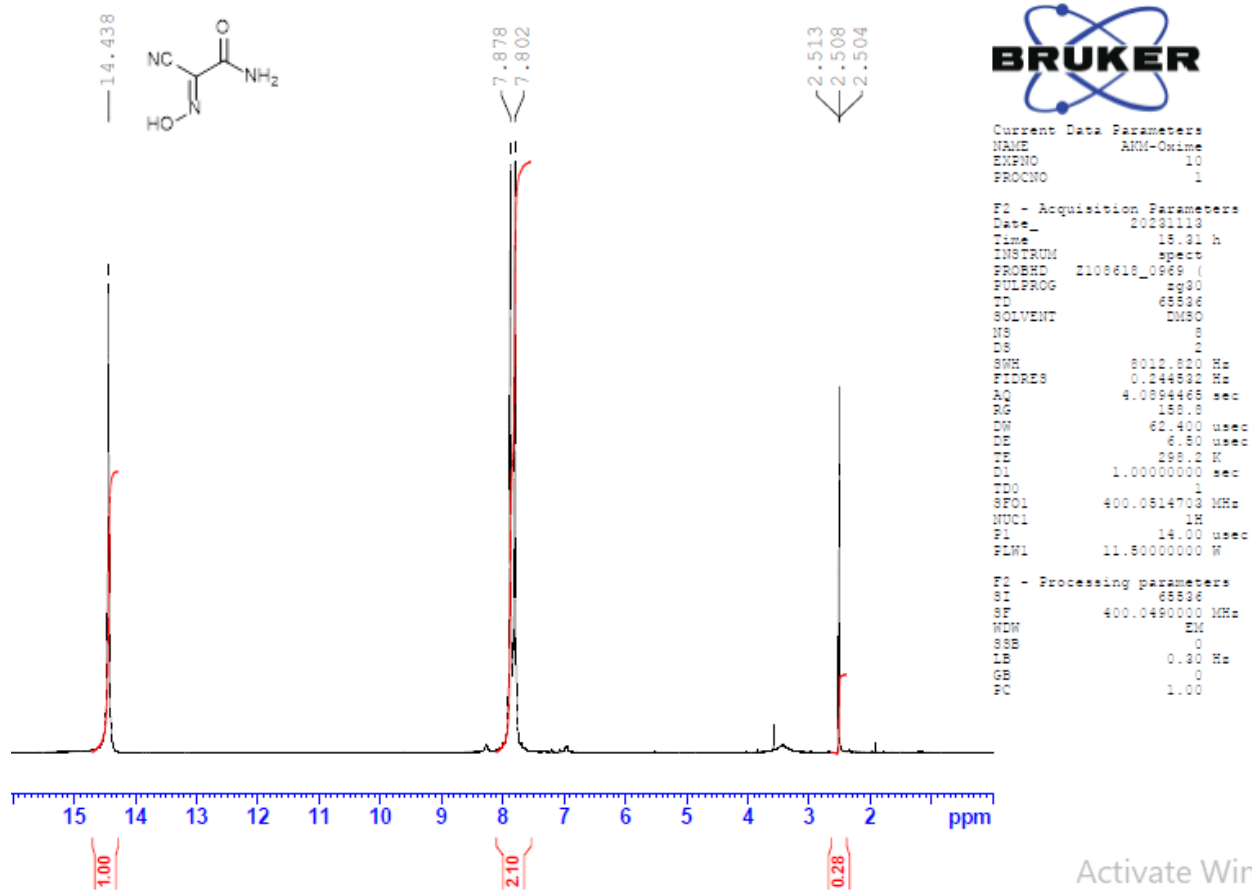



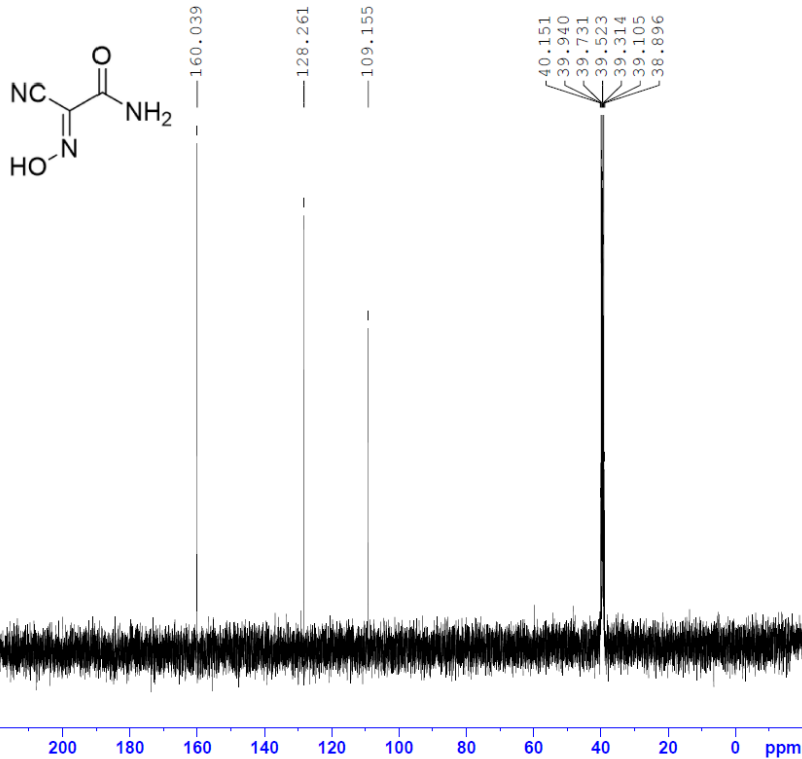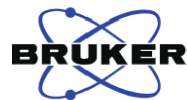

Current Data Parameters  
 NAME DM344  
 EXPNO 11  
 PROCNO 1

F2 - Acquisition Parameters  
 Date\_ 20210115  
 Time\_ 17.14 h  
 INSTRUM spect  
 PROBHD z150365\_0005 ( )  
 PULPROG zgpg30  
 TD 65536  
 SOLVENT DMSO  
 NS 512  
 DS 4  
 SMH 24938.461 Hz  
 FIDRES 0.733596 Hz  
 AQ 1.3631498 sec  
 RG 204.68  
 DW 20.800 usec  
 DE 18.00 usec  
 TE 299.2 K  
 DL 2.00000000 sec  
 D11 0.03000000 sec  
 TD0 1  
 SF01 100.6228298 MHz  
 NUC1 13C  
 P1 10.50 usec  
 PLW1 36.68799973 W  
 SF02 400.1316005 MHz  
 NUC2 1H  
 CPDPRG2 waltz16  
 PCPD2 80.00 usec  
 PLW2 7.25239992 W  
 PLW12 0.16317999 W  
 PLW13 0.08194900 W

F2 - Processing parameters  
 SI 32768  
 SF 100.6127685 MHz  
 WDW EM  
 SSB 0  
 LB 1.00 Hz  
 GB 0  
 PC 1.40

## 2-Amino-2-cyanoacetamide (13)

Chemical Formula:  $C_3H_5N_3O$

$^1H$  NMR (DMSO- $d_6$ , 400 MHz,)  $\delta$  4.43 (s, 1H, -CH-), 7.60 (br, 2H, -CONH $_2$ )

$^{13}C$  NMR (DMSO- $d_6$  100 MHz)  $\delta$  47.3 (CH), 120.1 (CN), 168.1 (CO)

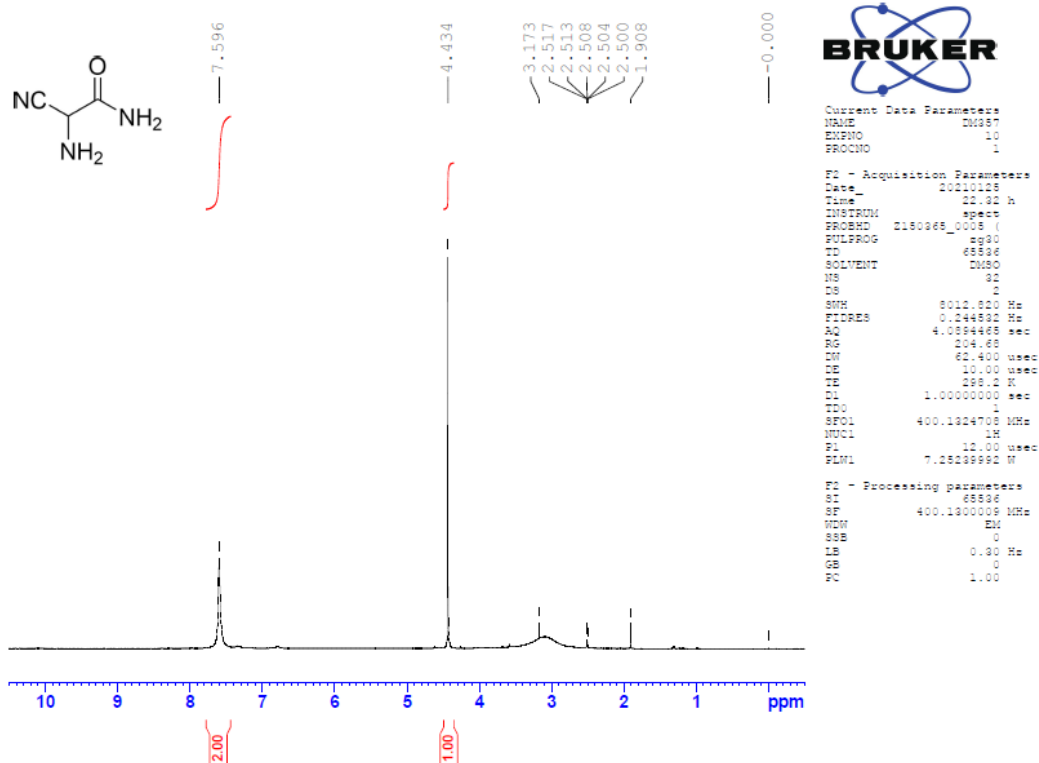

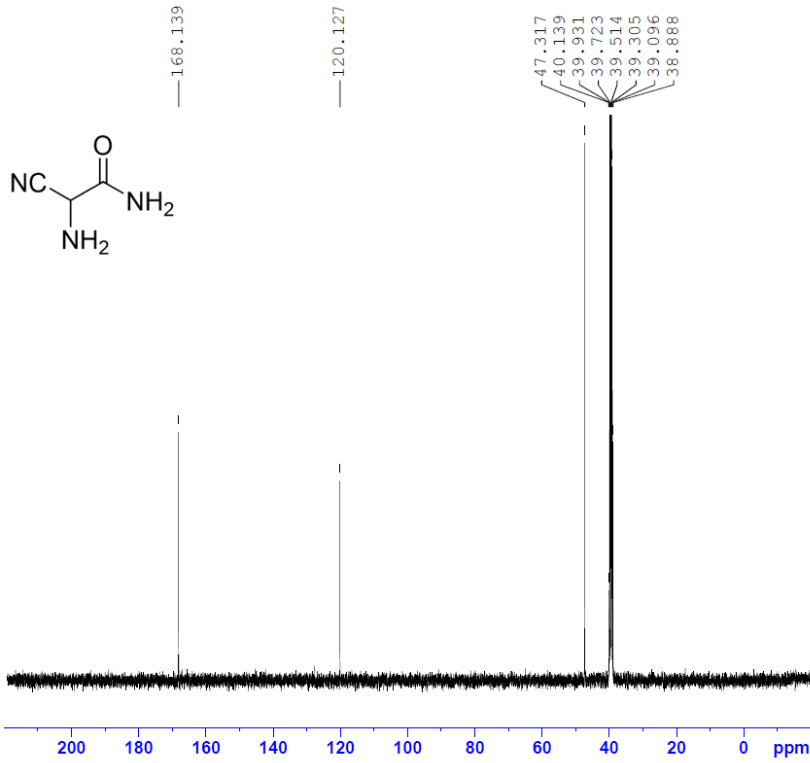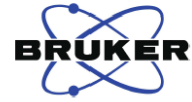

```

Current Data Parameters
NAME      DM357
EXPNO    11
PROCNO    1

F2 - Acquisition Parameters
Date_    20210126
Time     0.31 h
INSTRUM  spect
PROBHD   Z150365_0005 (
PULPROG  zgpg30
TD       65536
SOLVENT  DMSO
NS       2048
DS       4
SWH      24038.461 Hz
FIDRES   0.733586 Hz
AQ       1.3631488 sec
RG       204.68
DW       20.800 usec
DE       18.00 usec
TE       299.1 K
DL       2.00000000 sec
D11      0.03000000 sec
TD0      1
SFO1     100.6228298 MHz
NUC1     13C
PI       10.50 usec
PLW1     36.68799973 W
SFO2     400.1316005 MHz
NUC2     1H
CPDPRG2  waltz16
PCPD2    80.00 usec
PLW2     7.25239982 W
PLW12    0.16317999 W
PLW13    0.08194900 W

F2 - Processing parameters
SI       32768
SF       100.6128110 MHz
WDW      EM
SSB      0
LB       1.00 Hz
GB       0
PC       1.40
  
```

### 5-Amino-1H-imidazole-4-carboxamide (AICA, 4)

Chemical Formula: C<sub>4</sub>H<sub>6</sub>N<sub>4</sub>O

<sup>1</sup>H-NMR (400 MHz, DMSO-d<sub>6</sub>), δ<sub>H</sub>: 5.48 (2H, br, -NH<sub>2</sub>), 6.67 (2H, br, -CONH<sub>2</sub>), 7.10 (1H, s, Ar-H), and 11.48 (br, -NH). <sup>13</sup>C-NMR (100 MHz, DMSO-d<sub>6</sub>), δ<sub>C</sub>: 110.5 (C), 129.7 (C), 145.3 (CH), 166.1 (CO).

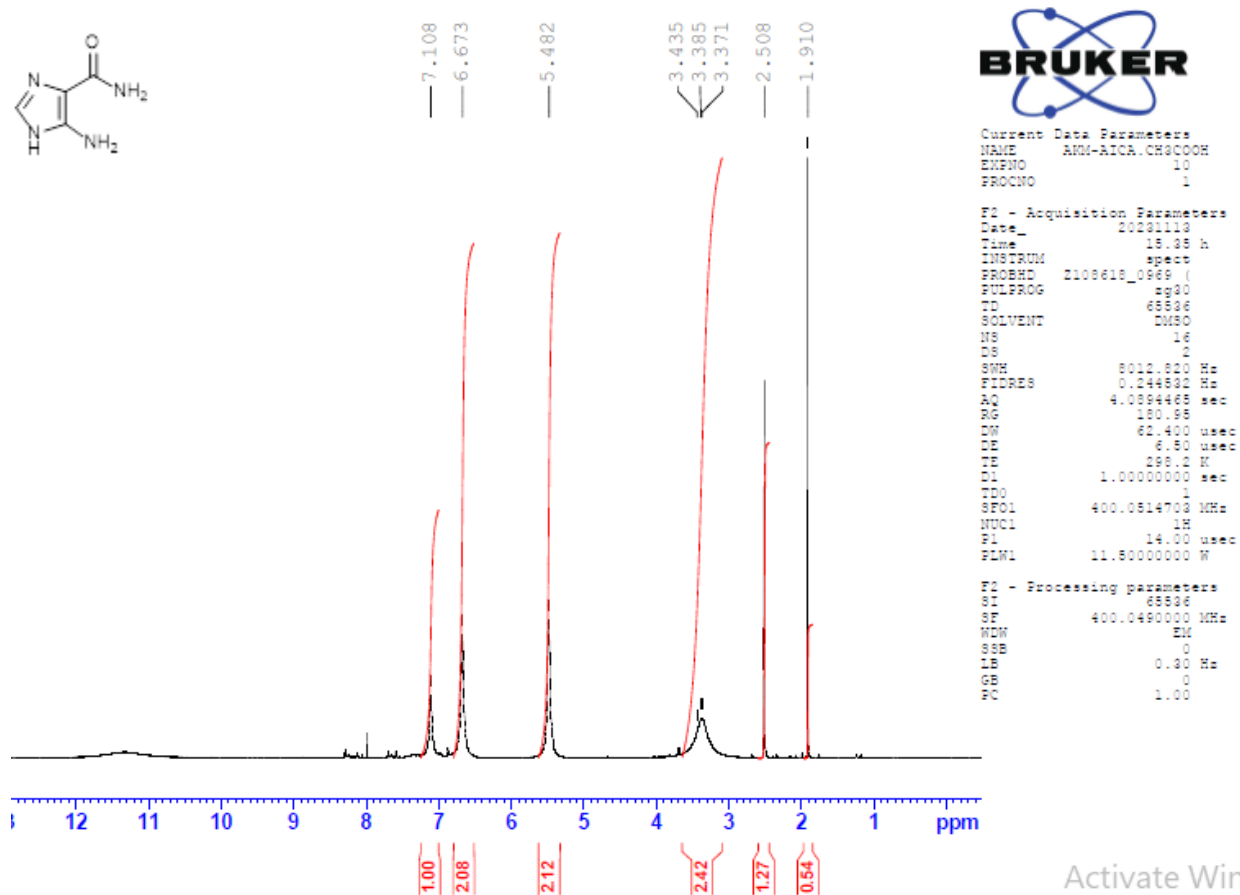

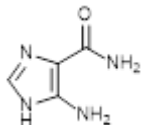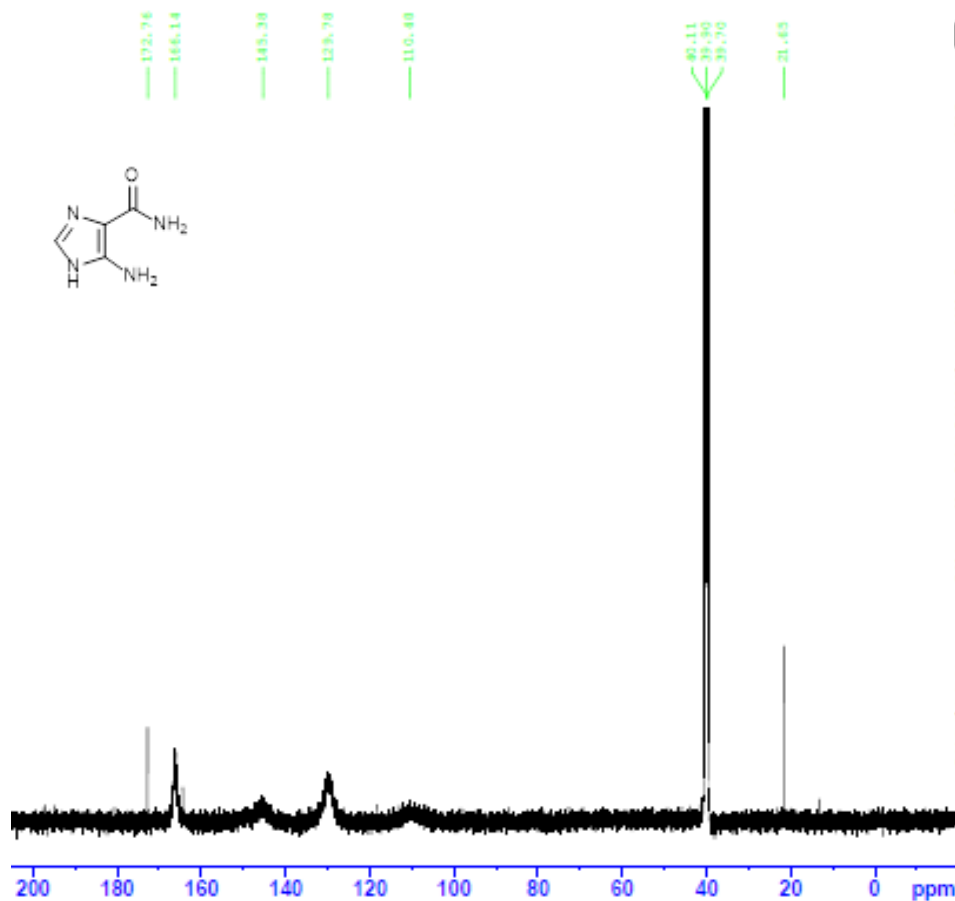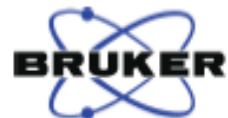

Current Data Parameters  
 NAME AJ04-AICA-CH3COOH-con  
 EXPNO 20  
 PROCNO 1

F2 - Acquisition Parameters  
 Date\_ 20231130  
 Time\_ 22.00 h  
 INSTRUM spect  
 PROBRD 2108618\_0969 ( )  
 PULPROG zgpg30  
 TD 65536  
 SOLVENT DMSO  
 NS 4096  
 DS 4  
 SWH 24038.461 Hz  
 FIDRES 0.733596 Hz  
 AQ 1.3631488 sec  
 RG 158.8  
 DW 20.800 usec  
 DE 6.50 usec  
 TE 298.2 K  
 D1 2.0000000 sec  
 D11 0.0300000 sec  
 TDO 1  
 SFO1 100.6024603 MHz  
 NUC1 13C  
 P1 10.00 usec  
 PLW1 57.0000000 W  
 SFO2 400.0506002 MHz  
 NUC2 1H  
 CPOPRG[2] waltz16  
 PCPD2 80.00 usec  
 PLW2 11.5000000 W  
 PLW12 0.27827001 W  
 PLW13 0.13997000 W

F2 - Processing parameters  
 SI 32768  
 SF 100.5924011 MHz  
 MW EM  
 SSB 0  
 LB 1.00 Hz  
 GB 0  
 PC 1.40

#### 4-Diazo-4H-imidazole-5-carboxamide (DICA, 5)

Chemical Formula: C<sub>4</sub>H<sub>3</sub>N<sub>5</sub>O

<sup>1</sup>H NMR (DMSO-d<sub>6</sub>, 400 MHz) δ 7.61 (s, 1H, -CH-), 7.82 (s, 1H, -CONH<sub>2</sub>), 8.0 (s, 1H, -CONH<sub>2</sub>)

<sup>13</sup>C NMR (DMSO-d<sub>6</sub> 100 MHz) δ 102.8 (C-N=N), 150.2 (C-CO), 155.8 (CH), 161.8 (CO)

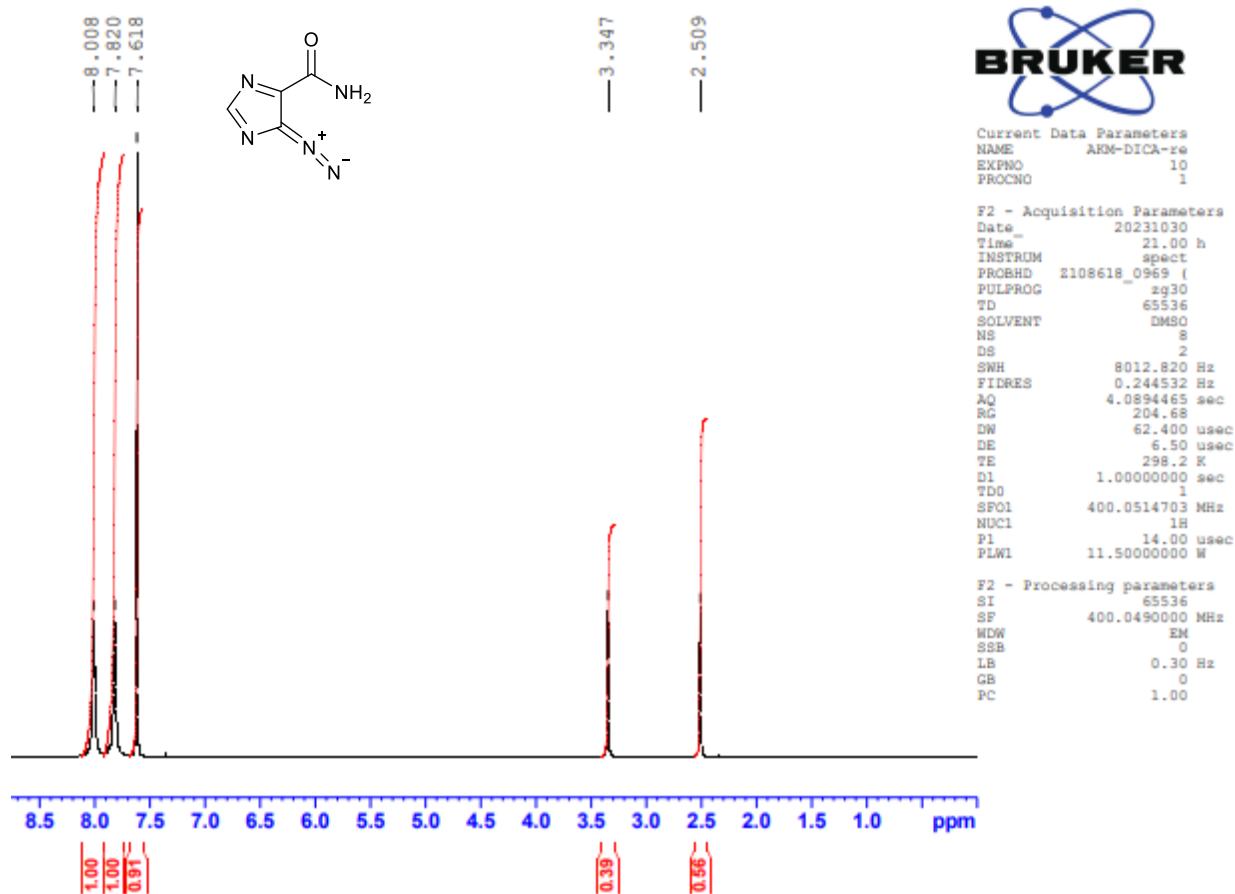

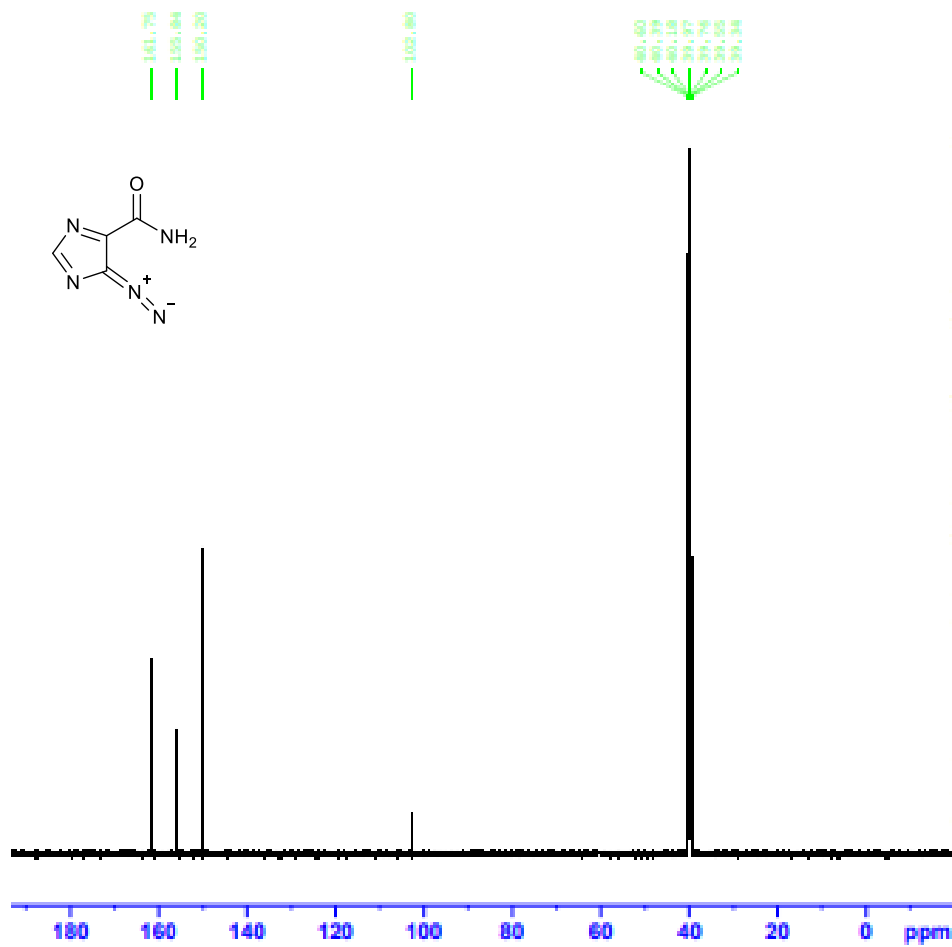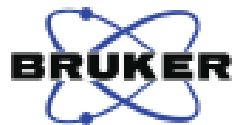

Current Data Parameters  
 NAME AM-01CA-re  
 EXPNO 11  
 PROCNO 1

F2 - Acquisition Parameters  
 Date\_ 20231010  
 Time\_ 21.17 h  
 INSTRUM spect  
 PROBHD Z100C10 0909 (4  
 PULPROG \_zgpg30  
 TD 65536  
 SOLVENT H2O  
 NS 256  
 DS 4  
 SWH 34038.441 Hz  
 FIDRES 0.733596 Hz  
 AQ 1.3631489 sec  
 RG 90.35  
 DW 20.800 usec  
 DE 6.50 usec  
 TE 298.2 K  
 D1 2.00000000 sec  
 D11 0.03000000 sec  
 TDD 1  
 SFO1 100.624603 MHz  
 NUC1 13C  
 P1 18.00 usec  
 PLN1 37.00000000 W  
 SFO2 400.0506002 MHz  
 NUC2 1H  
 CPDPRG2 waltz16  
 PCPD0 90.00 usec  
 PLN2 11.50000000 W  
 PLN3 0.27827001 W  
 PLN4 0.13997000 W

F2 - Processing parameters  
 SI 32768  
 SF 100.5924011 MHz  
 NDN 0  
 ZS 0  
 LB 1.00 Hz  
 GB 0  
 PC 1.40

### AHX (6)

Chemical Formula: C<sub>4</sub>H<sub>3</sub>N<sub>5</sub>O,

<sup>1</sup>H NMR (CD<sub>3</sub>OD, 400 MHz) δ 8.41 (s, 1H, -CH-)

<sup>13</sup>C-NMR (100 MHz, CD<sub>3</sub>OD), δ<sub>C</sub>: 119.7, 143.1, 152.0, 153.0

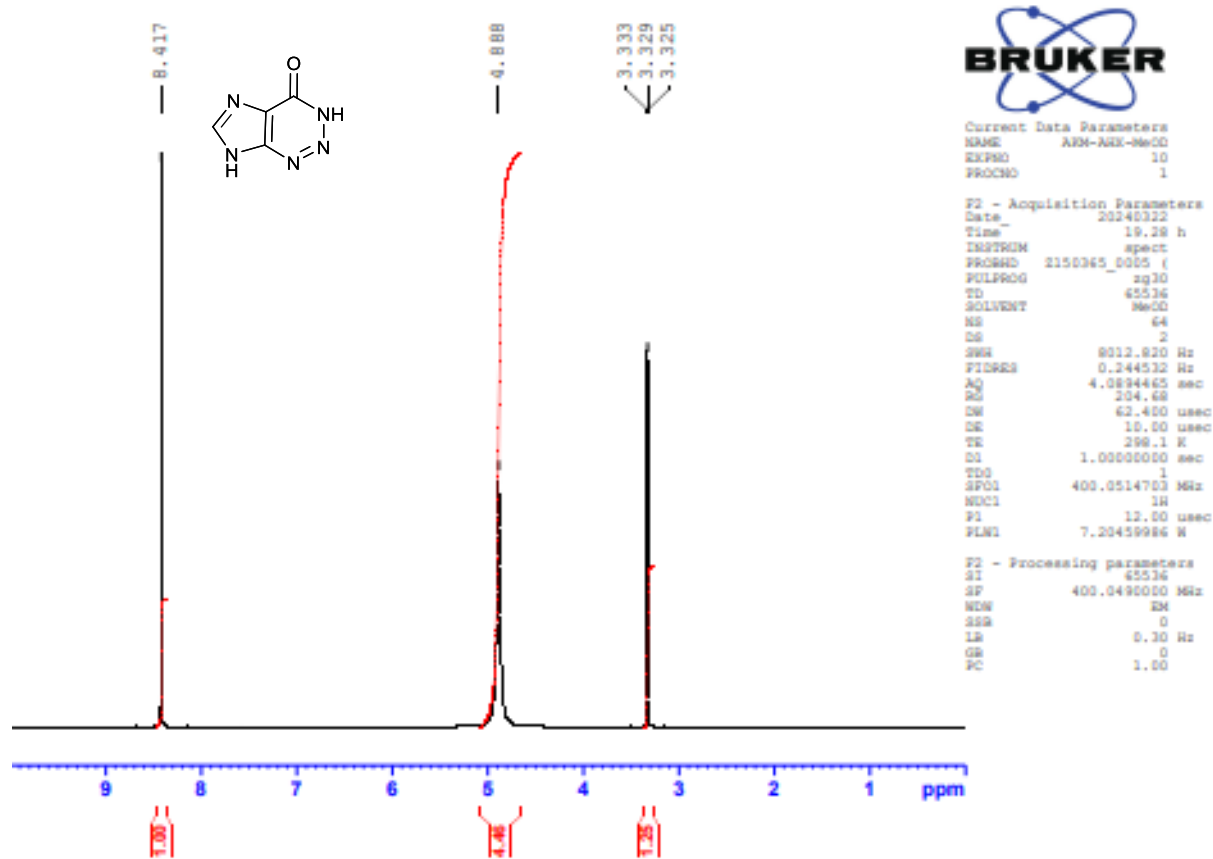



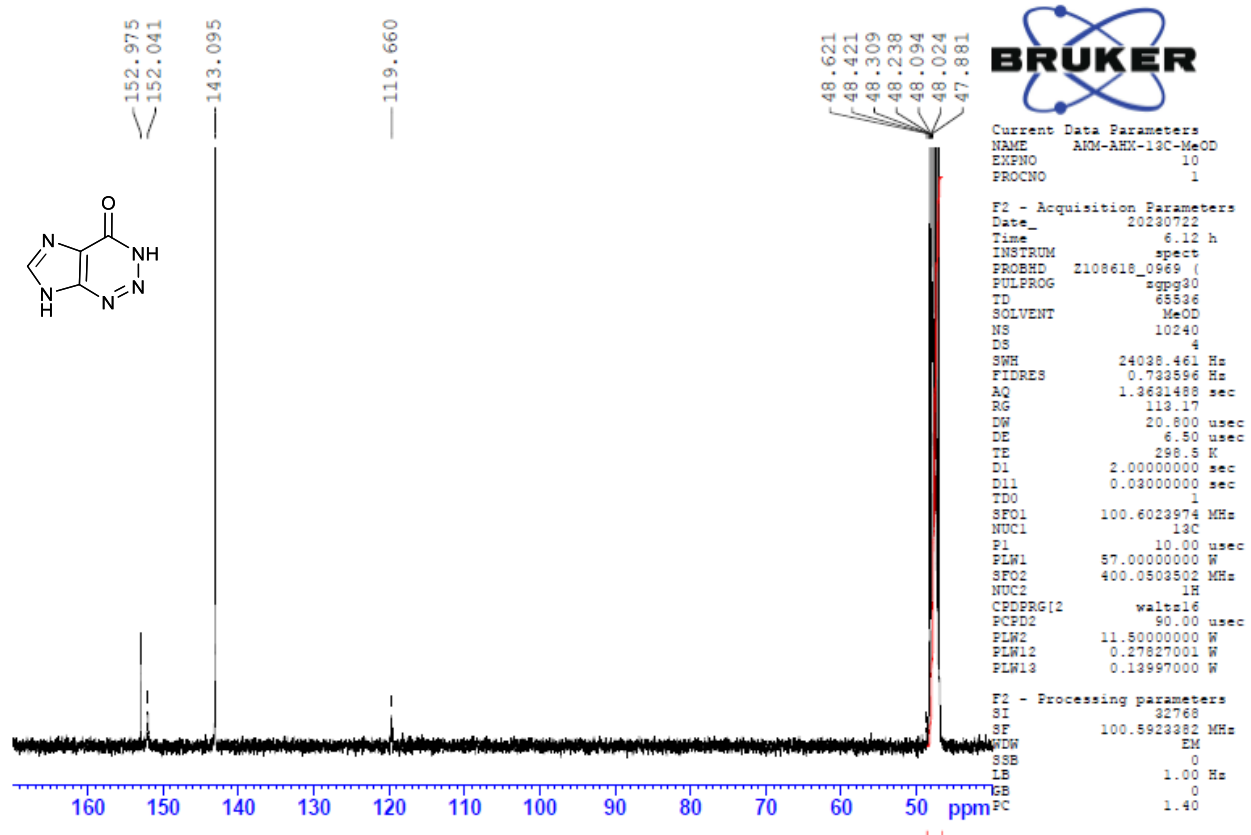

**By-product: 5-Hydroxy-1H-imidazole-4-carbonitrile (15)**

Chemical formula: C<sub>4</sub>N<sub>3</sub>H<sub>4</sub>O,

<sup>1</sup>H NMR (CD<sub>3</sub>OD, 400 MHz): δ 6.933 (s, 1H, -CH-)

<sup>13</sup>C NMR (CD<sub>3</sub>OD, 100 MHz) δ 22.6, 85.6, 119.9, 127.2, 163.9, 178.7

DEPT 135(CD<sub>3</sub>OD, 100 MHz) δ 22.6, 127.2, DEPT 90 (CD<sub>3</sub>OD, 100 MHz) δ 127.2

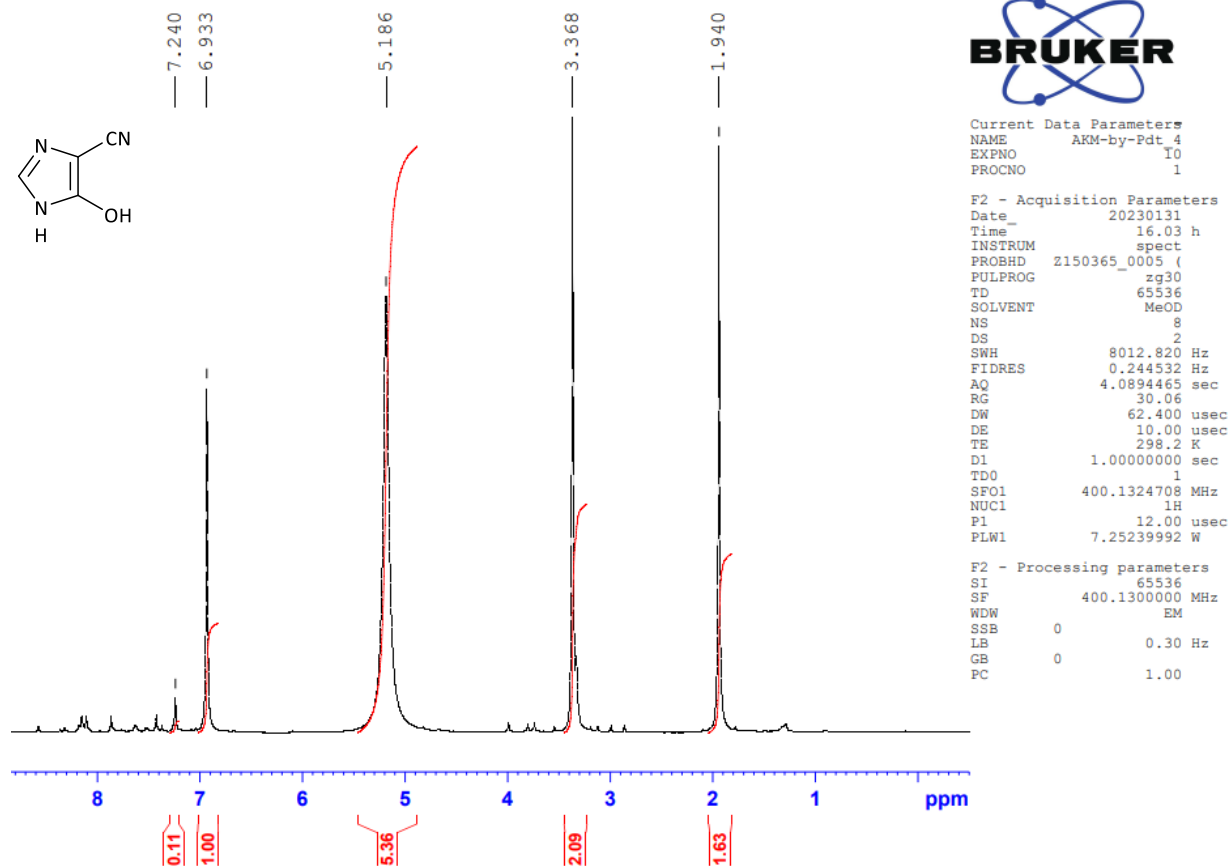

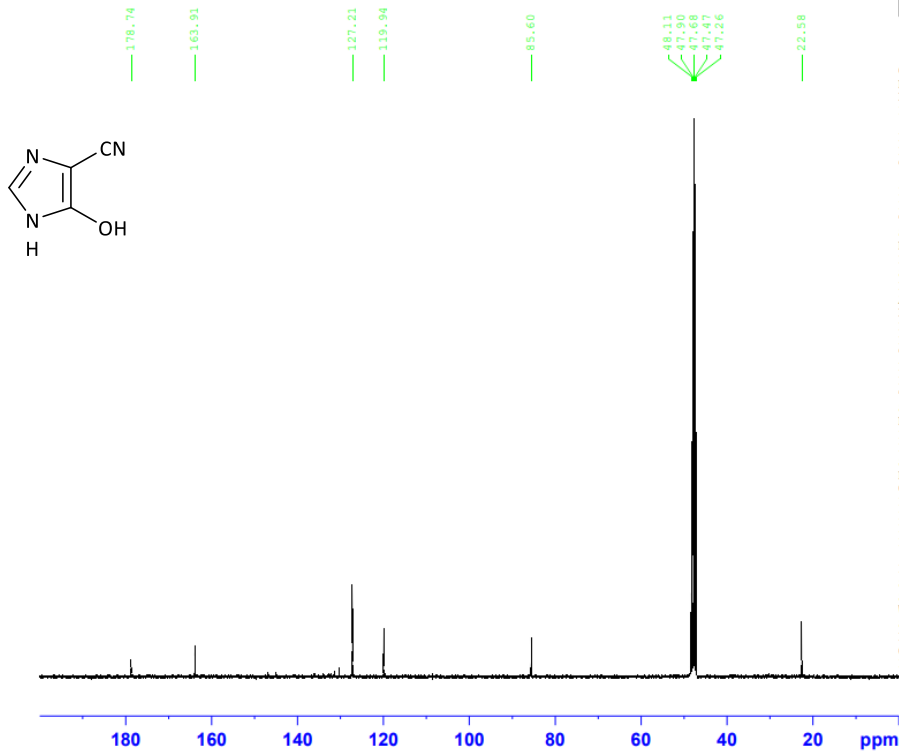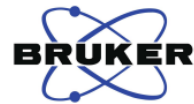

Current Data Parameters  
 NAME AKM-By-Pdt  
 EXPNO 31  
 PROCNO 1

F2 - Acquisition Parameters  
 Date\_ 20230130  
 Time\_ 17.53 h  
 INSTRUM spect  
 PROBHD Z150365\_0005 (  
 PULPROG zgpg30  
 TD 65536  
 SOLVENT MeOD  
 NS 64  
 DS 4  
 SWH 24038.461 Hz  
 FIDRES 0.733596 Hz  
 AQ 1.3631488 sec  
 RG 49.46  
 DW 20.800 usec  
 DE 18.00 usec  
 TE 298.1 K  
 D1 2.00000000 sec  
 D11 0.03000000 sec  
 TD0 1  
 SFO1 100.6228298 MHz  
 NUC1 13C  
 P1 10.50 usec  
 PLW1 36.68799973 W  
 SFO2 400.1316005 MHz  
 NUC2 1H  
 CPDPRG2 waltz16  
 PCPD2 80.00 usec  
 PLW2 7.25239992 W  
 PLW12 0.16317999 W  
 PLW13 0.08194900 W

F2 - Processing parameters  
 SI 32768  
 SF 100.6127685 MHz  
 WDW EM  
 SSB 0  
 LB 1.00 Hz  
 GB 0  
 PC 1.40

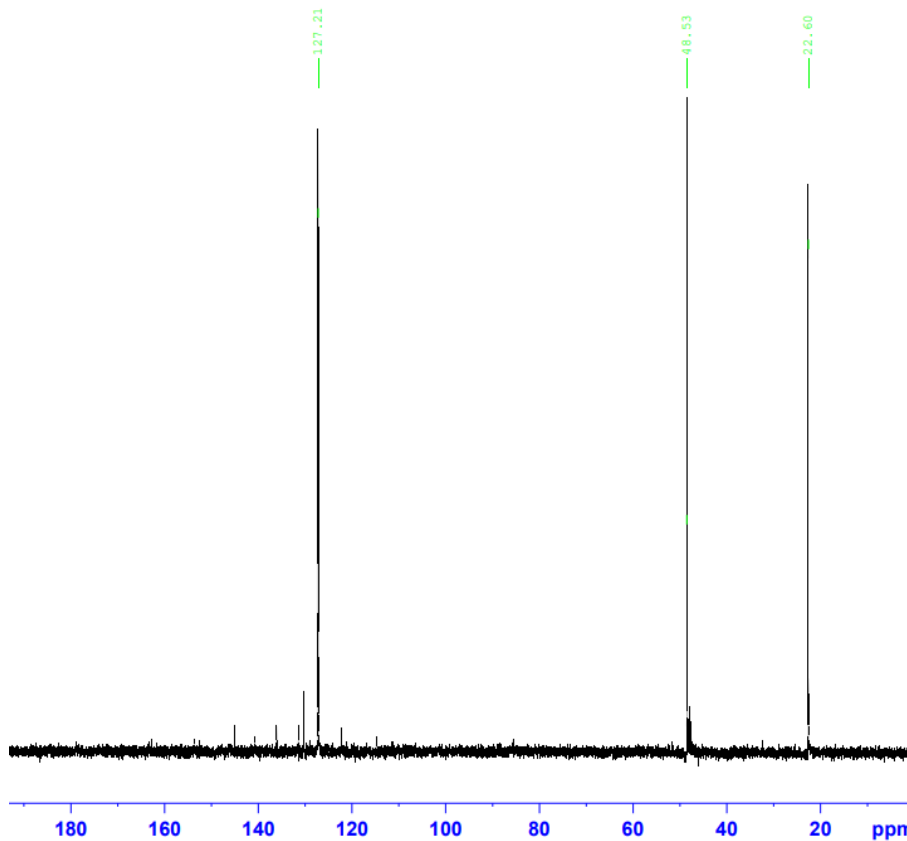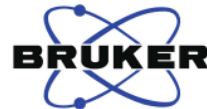

Current Data Parameters  
 NAME AKM-by-Pdt\_2  
 EXPNO 10  
 PROCNO 1

F2 - Acquisition Parameters  
 Date\_ 20230131  
 Time\_ 15.34 h  
 INSTRUM spect  
 PROBHD Z150365\_0005 (  
 PULPROG deptsp135  
 TD 65536  
 SOLVENT MeOD  
 NS 128  
 DS 8  
 SWH 24038.461 Hz  
 FIDRES 0.733596 Hz  
 AQ 1.3631488 sec  
 RG 204.68  
 DW 20.800 usec  
 DE 18.00 usec  
 TE 298.1 K  
 CNST2 145.0000000  
 D1 2.00000000 sec  
 D2 0.00344828 sec  
 D12 0.00002000 sec  
 TD0 1  
 SFO1 100.6228298 MHz  
 NUC1 13C  
 P1 10.50 usec  
 P13 2000.00 usec  
 PLM0 0 W  
 PLW1 36.68799973 W  
 SPNAM[5] Crp60comp.4  
 SPOAL5 0.500  
 SPOFFS5 0 Hz  
 SFW5 6.18020010 W  
 SFO2 400.1316005 MHz  
 NUC2 1H  
 CPDPRG2 waltz16  
 P3 12.00 usec  
 P4 24.00 usec  
 PCPD2 80.00 usec  
 PLW2 7.25239992 W  
 PLW12 0.16317999 W

F2 - Processing parameters  
 SI 32768  
 SF 100.6127685 MHz  
 WDW EM  
 SSB 0  
 LB 1.00 Hz  
 GB 0  
 PC 1.40

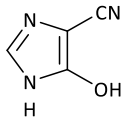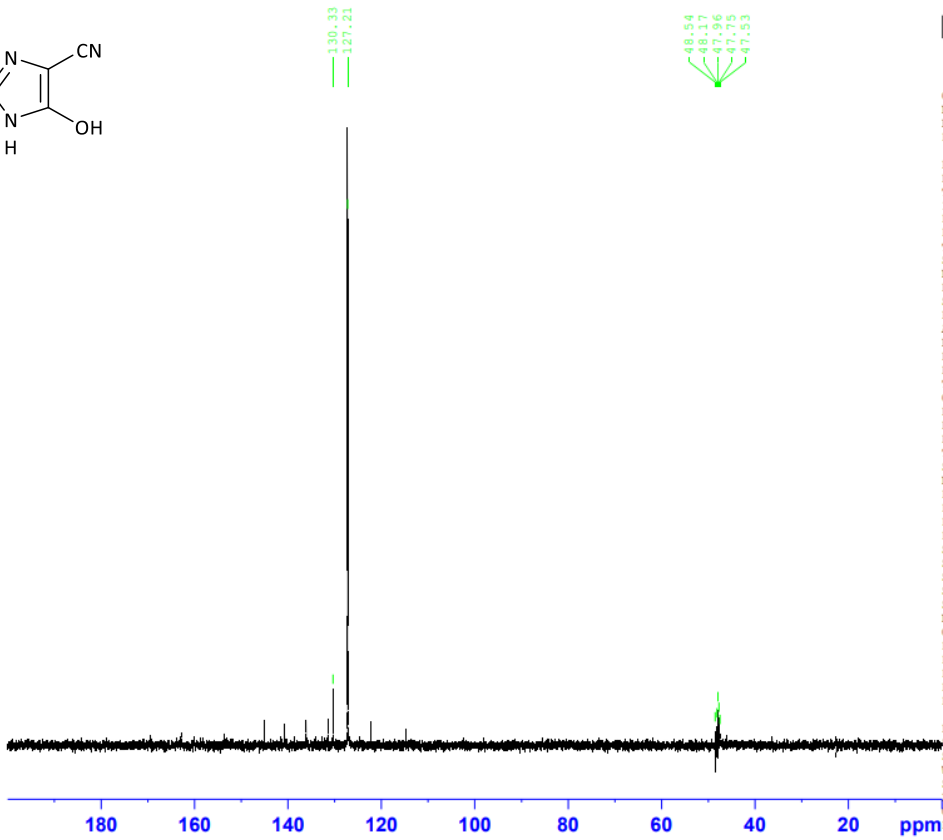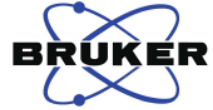

```

Current Data Parameters
NAME          AKM-By-Pdt
EXPNO        11
PROCNO       1

F2 - Acquisition Parameters
Date_        20230131
Time         15.42 h
INSTRUM      spect
PROBHD       z150365_0005 (
PULPROG      dEptsp90
TD           65536
SOLVENT      MeOD
NS           128
DS           8
SWH          24038.461 Hz
FIDRES       0.733596 Hz
AQ           1.3631488 sec
RG           35.06
DW           20.800 usec
DE           18.00 usec
TE           298.1 K
CNST2        145.0000000
D1           2.00000000 sec
D2           0.00344828 sec
D12          0.00002000 sec
TD0          1
SFO1         100.6228298 MHz
NUC1         13C
P1           10.50 usec
P13         2000.00 usec
PLW0         0 W
PLW1         36.68799973 W
SPNAM[5]    Crp60comp.4
SPOALS       0.500
SPOFFS5      0 Hz
SPW5         6.18020010 W
SFO2         400.1316005 MHz
NUC2         1H
CPDPRG[2]   waltz16
P3           12.00 usec
P4           24.00 usec
PCPD2       80.00 usec
PLW2         7.25239992 W
PLW12        0.16317999 W

F2 - Processing parameters
SI           32768
SF           100.6127685 MHz
WDW          EM
SSB          0
LB           1.00 Hz
GB          0
PC           1.40
  
```

### Ethyl 2-amino-2-cyanoacetate (19)

Chemical Formula:  $C_5H_8N_2O_2$ ,

$^1H$  NMR (400 MHz, DMSO- $d_6$ )  $\delta$  1.23 (t, 3H), 4.20 (q, 2H)

$^{13}C$  NMR (DMSO- $d_6$  100 MHz)  $\delta$  13.8 ( $CH_3$ ), 46.4 ( $CH_2$ ), 62.0 (CH), 118.6 (CN), 167.2 (CO)

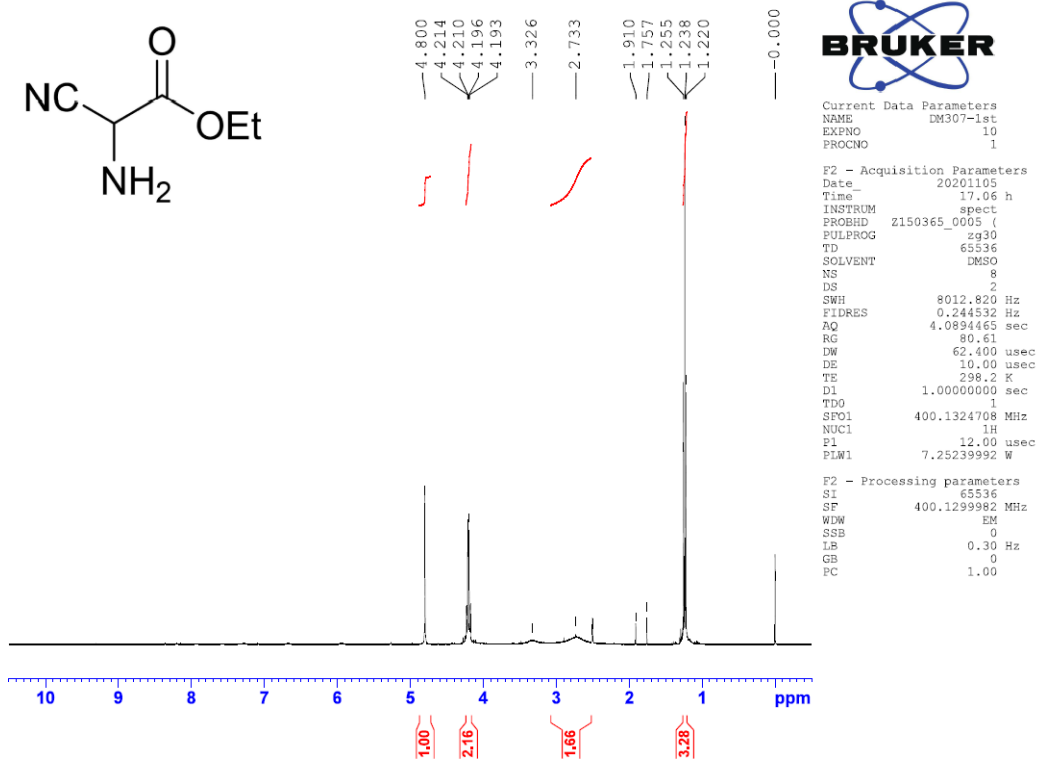

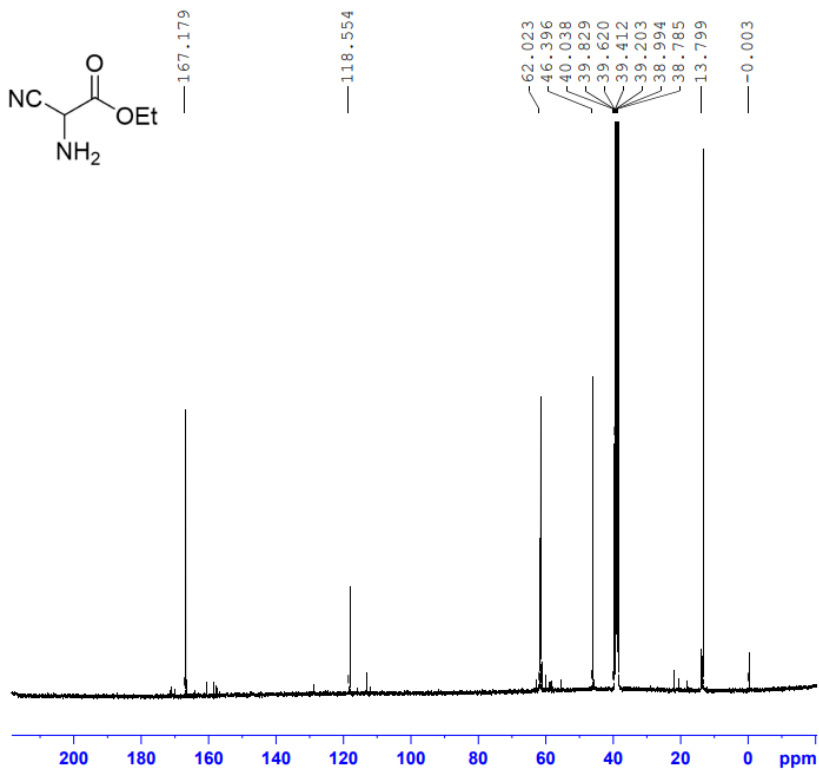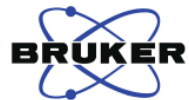

Current Data Parameters  
 NAME DM307-1st  
 EXPNO 11  
 PROCNO 1

F2 - Acquisition Parameters  
 Date\_ 20201110  
 Time 10.28 h  
 INSTRUM spect  
 PROBHD z150365\_0005 ( )  
 PULPROG zgpg30  
 TD 65536  
 SOLVENT DMSO  
 NS 1024  
 DS 4  
 SWH 24038.461 Hz  
 FIDRES 0.733596 Hz  
 AQ 1.3631488 sec  
 RG 35.06  
 DW 20.800 usec  
 DE 18.00 usec  
 TE 298.2 K  
 D1 2.0000000 sec  
 D11 0.0300000 sec  
 TDO 1  
 SFO1 100.6228298 MHz  
 NUC1 13C  
 P1 10.50 usec  
 PLW1 36.68799973 W  
 SFO2 400.1316005 MHz  
 NUC2 1H  
 CPDPRG[2] waltz16  
 PCPD2 80.00 usec  
 PLW2 7.25239992 W  
 PLW12 0.16317999 W  
 PLW13 0.08194900 W

F2 - Processing parameters  
 SI 32768  
 SF 100.6128745 MHz  
 WDW EM  
 SSB 0  
 LB 1.00 Hz  
 GB 0  
 PC 1.40

### Ethyl 5-aminoimidazole-4-carboxylate (20)

Chemical Formula:  $C_6H_9N_3O_2$ ,  $R_f = 0.50$  (AcOEt : MeOH = 90 : 10)

$^1H$  NMR (DMSO- $d_6$ , 400 MHz)  $\delta$  1.26 (t,  $J = 7.2$ , 3H,  $-CH_3$ ), 4.20 (q,  $J = 7.2$ , 2H,  $-CH_2-$ ), 5.54 (br, 2H,  $-NH_2$ ), 7.32 (s, 1H, Ar-H), 11.97 (br, 1H,  $-NH-$ )

$^{13}C$  NMR (DMSO- $d_6$  100 MHz)  $\delta$  161.1, 162.84 (C=O), 153.2 (N=C-N), 135.4 (N-C-N), 101.2 (C-CO), 58.6 ( $-CH_2-$ ), 14.5 ( $-CH_3$ )

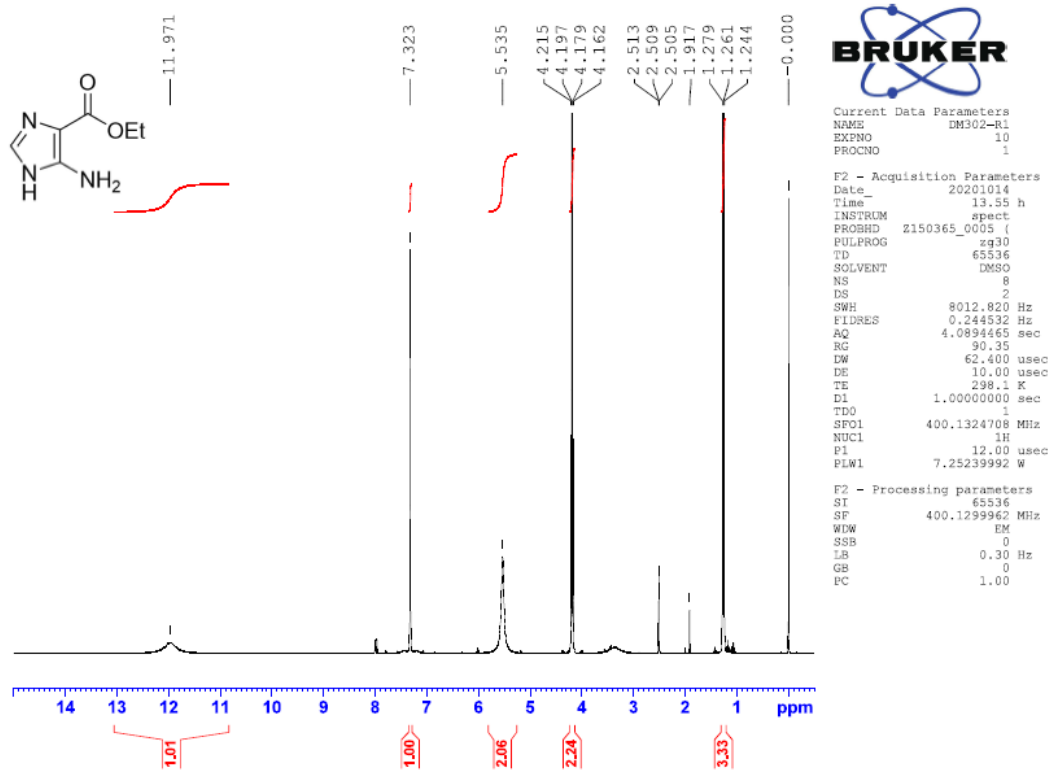

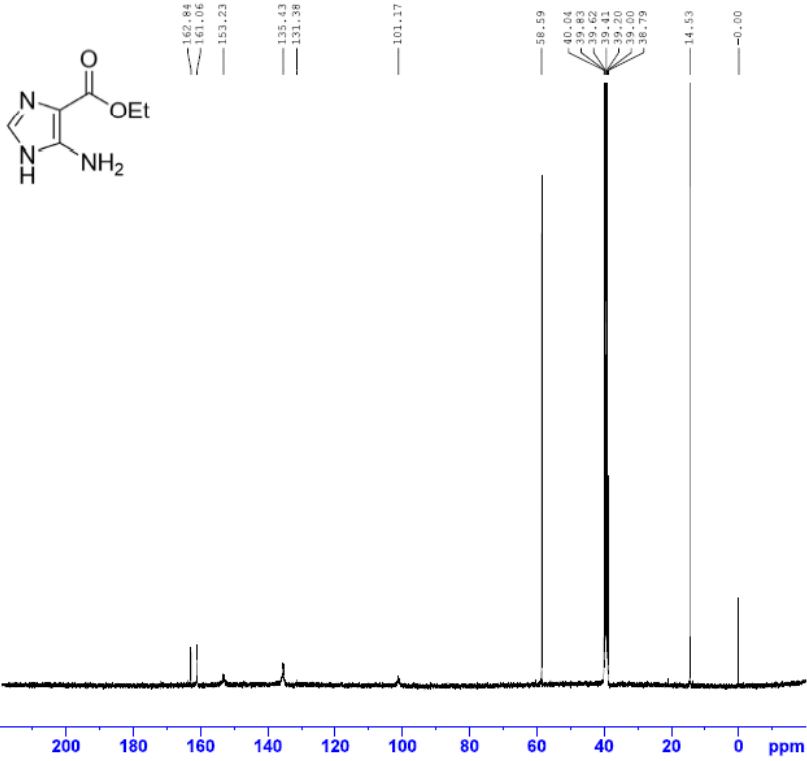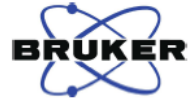

Current Data Parameters  
 NAME DM302-R1  
 EXPNO 11  
 PROCNO 1

F2 - Acquisition Parameters  
 Date\_ 20201014  
 Time\_ 14.26 h  
 INSTRUM spect  
 PROBHD z150365\_0005 (zppg30  
 PULPROG zgpg30  
 TD 65536  
 SOLVENT DMSO  
 NS 512  
 DS 4  
 SWH 24038.461 Hz  
 FIDRES 0.733596 Hz  
 AQ 1.3631488 sec  
 RG 43.17  
 LW 20.800 usec  
 DE 18.00 usec  
 TE 298.1 K  
 D1 2.0000000 sec  
 D11 0.0300000 sec  
 TD0 1  
 SFO1 100.6228298 MHz  
 NUC1 13C  
 P1 10.50 usec  
 PLW1 36.68799973 W  
 SFO2 400.1316005 MHz  
 NUC2 1H  
 CFP2PRG2 waltz16  
 PCPD2 80.00 usec  
 PLW2 7.25239992 W  
 PLW12 0.16317999 W  
 PLW13 0.08194900 W

F2 - Processing parameters  
 SI 32768  
 SF 100.6128228 MHz  
 WDW EM  
 SSB 0  
 LB 1.00 Hz  
 GB 0  
 PC 1.40



## Methyl 2-cyano-2-(hydroxyimino)acetate (22)

Chemical Formula: C<sub>4</sub>H<sub>4</sub>N<sub>2</sub>O<sub>3</sub>,

<sup>1</sup>H NMR (DMSO-d<sub>6</sub>, 400 MHz) δ 3.85 (s, 3H, -CH<sub>3</sub>), 15.12 (br, 1H, -OH)

<sup>13</sup>C NMR (DMSO-d<sub>6</sub> 100 MHz) δ 53.4 (CH<sub>3</sub>), 108.9 (CN), 125.7 (C), 159.0 (CO)

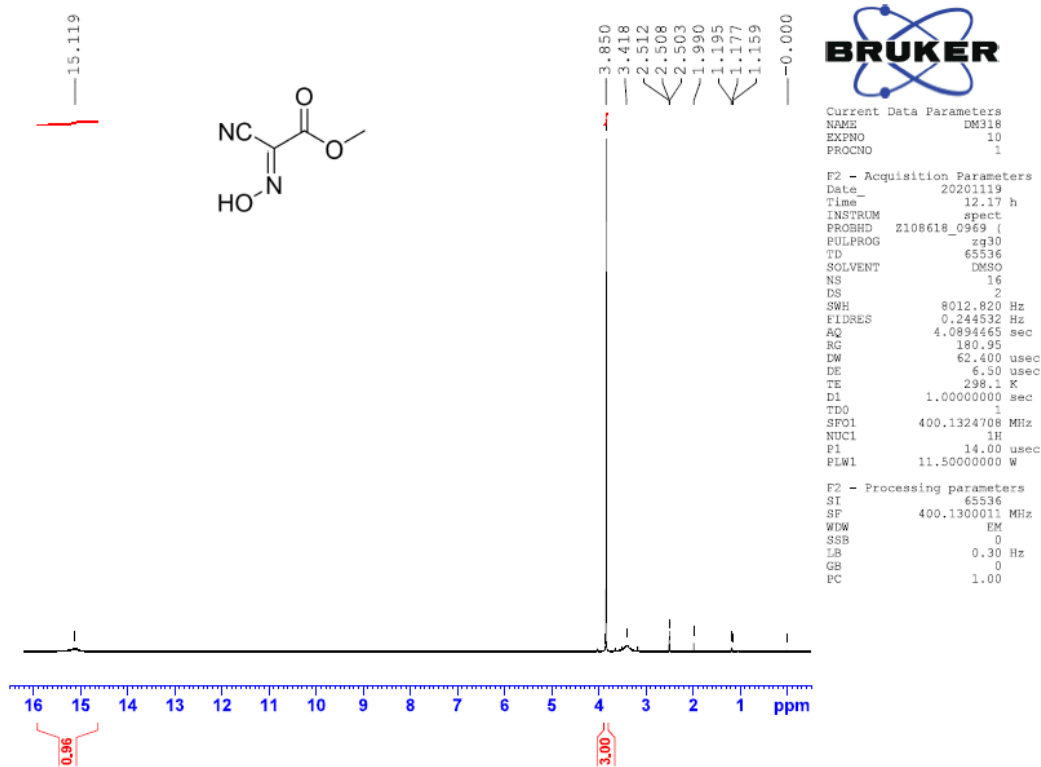

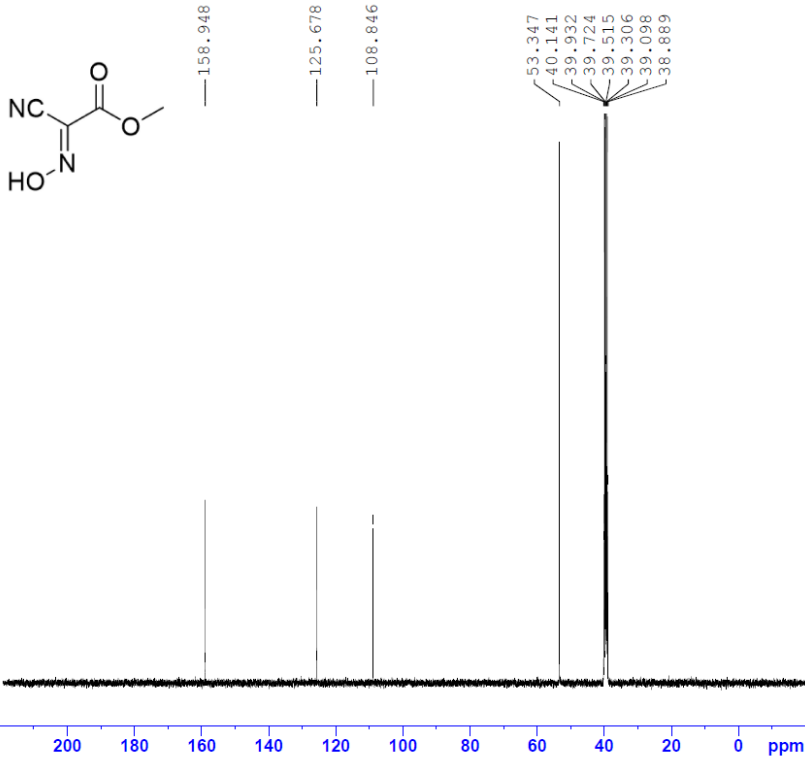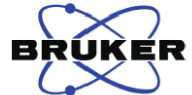

Current Data Parameters  
 NAME DM318  
 EXPNO 11  
 PROCNO 1

F2 - Acquisition Parameters  
 Date\_ 20201119  
 Time 12.48 h  
 INSTRUM spect  
 PROBEID Z108618\_0969 ( )  
 PULPROG zgpg30  
 TD 65536  
 SOLVENT DMSO  
 NS 512  
 DS 4  
 SWH 24038.461 Hz  
 FIDRES 0.733596 Hz  
 AQ 1.3631488 sec  
 RG 113.17  
 EW 20.800 usec  
 DE 6.50 usec  
 TE 298.2 K  
 D1 2.00000000 sec  
 D11 0.03000000 sec  
 ID0 1  
 SFO1 100.6228298 MHz  
 NUC1 13C  
 P1 10.00 usec  
 PLW1 57.00000000 W  
 SFO2 400.1316005 MHz  
 NUC2 1H  
 CDPFRG(2) waltz16  
 PCPD2 90.00 usec  
 PLW2 11.50000000 W  
 PLW12 0.27827001 W  
 PLW13 0.13997000 W

F2 - Processing parameters  
 SI 32768  
 SF 100.6128132 MHz  
 WDW EM  
 SSB 0  
 LB 1.00 Hz  
 GB 0  
 PC 1.40

### Methyl 2-amino-2-cyanoacetate (23)

Chemical Formula:  $C_4H_6N_2O_2$ ,

$^1H$  NMR (DMSO- $d_6$ , 400 MHz)  $\delta$  3.33 (br, 2H,  $-NH_2$ ), 3.75 (s, 3H,  $-OMe$ ), 4.83 (s, 1H,  $-CH-$ )

$^{13}C$  NMR (DMSO- $d_6$  100 MHz)  $\delta$  46.4 (CH $_3$ ), 53.1 (CH), 118.6 (CN), 167.8 (CO)

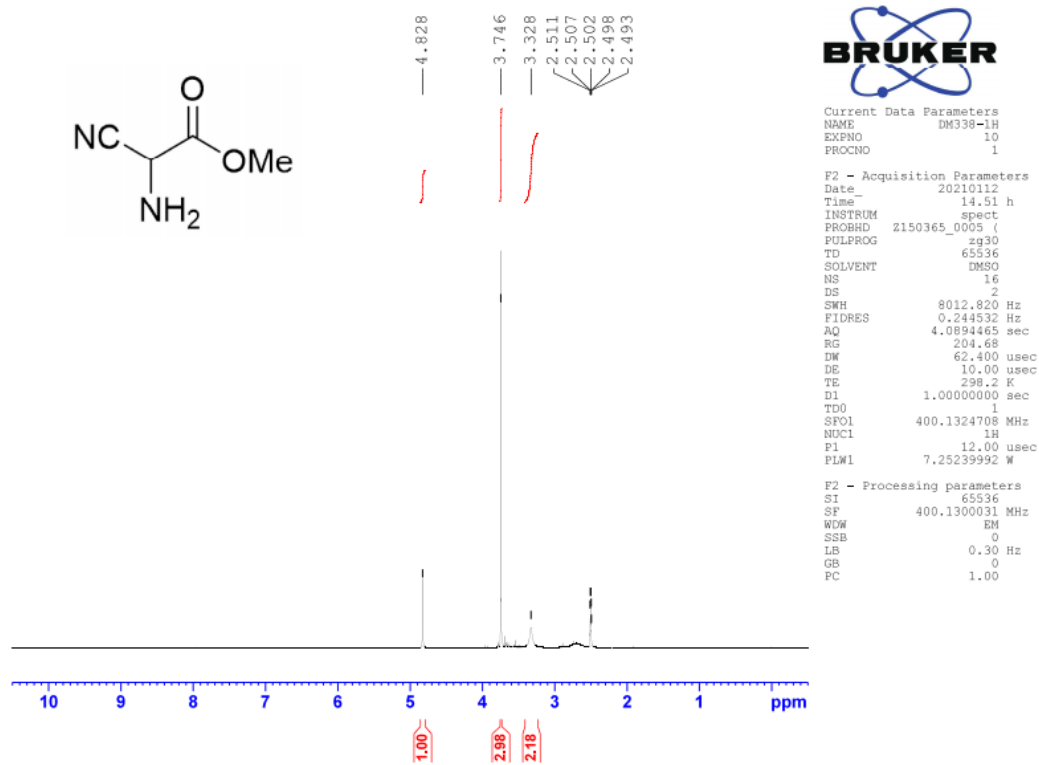

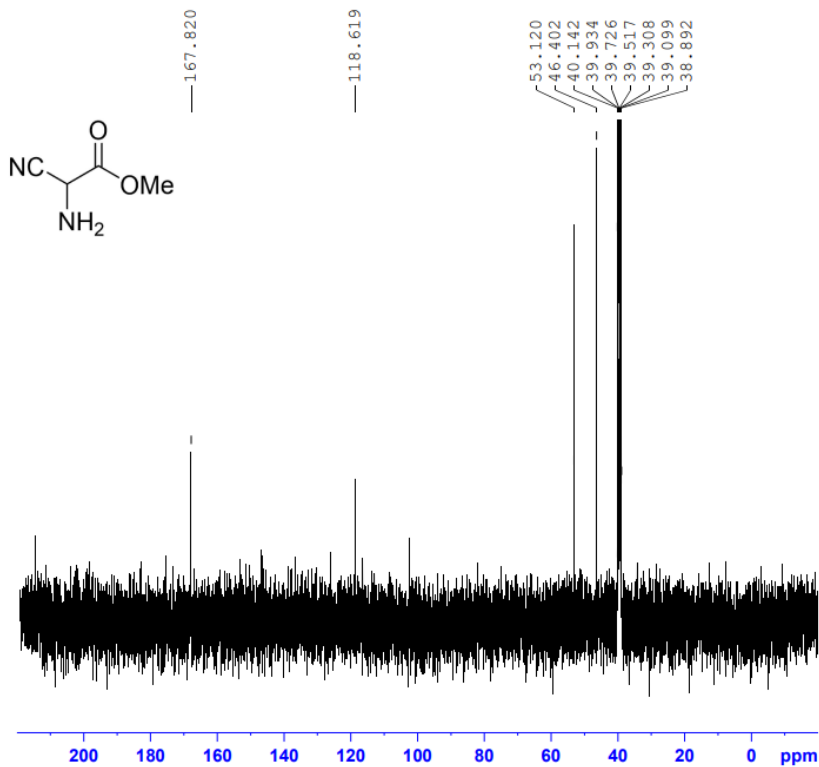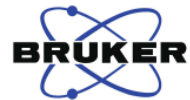

Current Data Parameters  
 NAME DM338-13C  
 EXPNO 10  
 PROCNO 1

F2 - Acquisition Parameters  
 Date\_ 20210112  
 Time\_ 19.49 h  
 INSTRUM spect  
 PROBHD z150365\_0005 ( )  
 PULPROG zgpg30  
 TD 65536  
 SOLVENT DMSO  
 NS 1024  
 DS 4  
 SWH 24038.461 Hz  
 FIDRES 0.733596 Hz  
 AQ 1.3631488 sec  
 RG 204.68  
 DW 20.800 usec  
 DE 18.00 usec  
 TE 298.2 K  
 D1 2.0000000 sec  
 D11 0.03000000 sec  
 TD0 1  
 SFO1 100.6228298 MHz  
 NUC1 13C  
 P1 10.50 usec  
 PLW1 36.68799973 W  
 SFO2 400.1316005 MHz  
 NUC2 1H  
 CPDPRG2 walzr16  
 PCPD2 80.00 usec  
 PLW2 7.25239992 W  
 PLW12 0.16317999 W  
 PLW13 0.08194900 W

F2 - Processing parameters  
 SI 32768  
 SF 100.6127685 MHz  
 WDW EM  
 SSB 0  
 LB 1.00 Hz  
 GB 0  
 PC 1.40

### Methyl 5-amino-1H-imidazole-4-carboxylate (24)

Chemical Formula:  $C_5H_7N_3O_2$ ,  $R_f = 0.50$  (AcOEt : Methanol = 90 : 10)

$^1H$  NMR (DMSO- $d_6$ , 400 MHz)  $\delta$  3.71 (s, 3H, -OCH $_3$ ), 5.57 (br, 2H, -NH $_2$ ), 7.34 (s, 1H, Ar-H), 12.10 (br, 1H, -NH-)

$^{13}C$  NMR (DMSO- $d_6$  100 MHz,)  $\delta$  50.2 (CH $_3$ ), 99.5 (C), 136.7 (C), 154.7 (CH), 161.1 (CO)

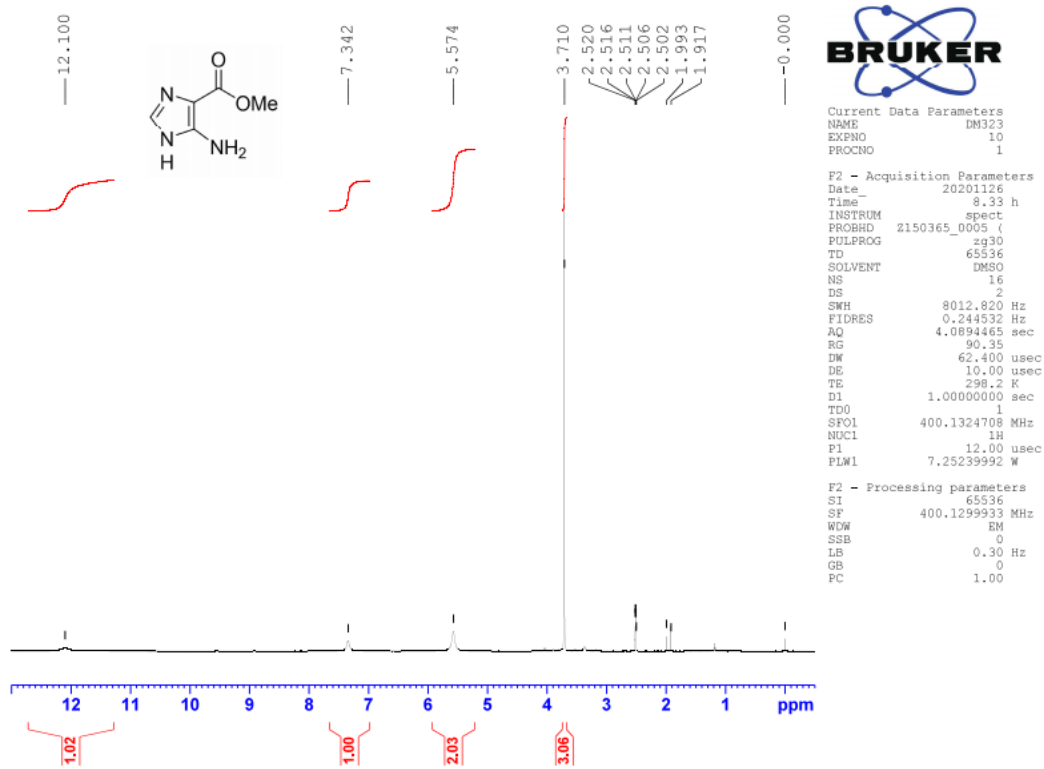

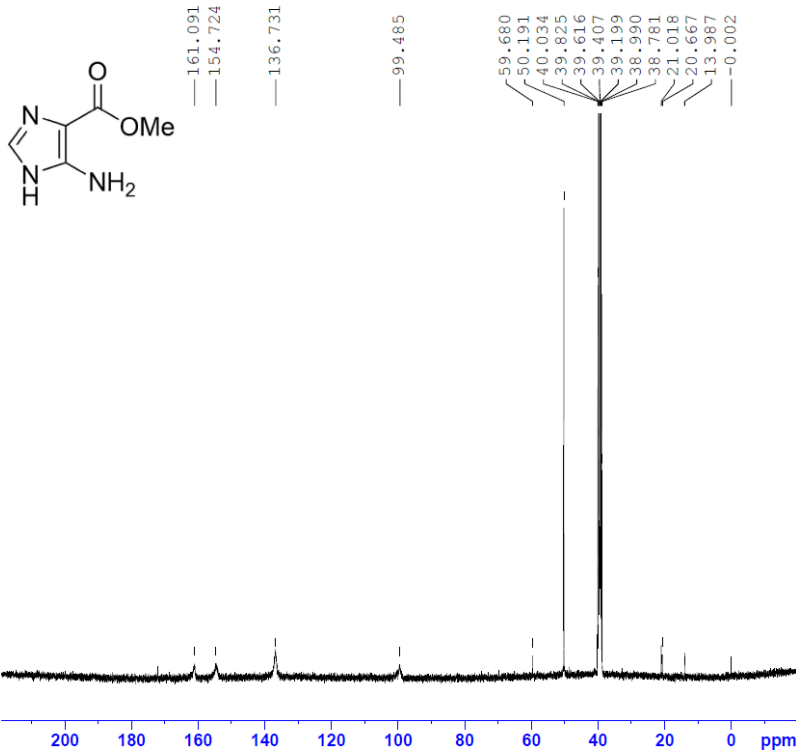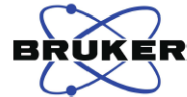

```

Current Data Parameters
NAME          DM323
EXPNO         11
PROCNO        1

F2 - Acquisition Parameters
Date_         20201126
Time          9.03 h
INSTRUM       spect
PROBHD        Z150365.0005 (
PULPROG       zgpg30
TD            65536
SOLVENT       DMSO
NS            512
DS            4
SMH           24038.461 Hz
FIDRES        0.733596 Hz
AQ            1.3631488 sec
RG            37.79
DW            20.800 usec
DE            18.00 usec
TE            298.2 K
D1            2.00000000 sec
D11           0.03000000 sec
TDO           1
SFO1          100.6228298 MHz
NUC1          13C
P1            10.50 usec
PLW1          36.68799973 W
SFO2          400.1316005 MHz
NUC2          1H
CPDPRG[2]     waltz16
PCPD2         80.00 usec
PLW2          7.25239992 W
PLW12         0.16317999 W
PLW13         0.08194900 W

F2 - Processing parameters
SI            32768
SF            100.6128220 MHz
WDW           EM
SSB           0
LB            1.00 Hz
GB            0
PC            1.40
  
```
